# Supplementary material for: Synthesis of 3,4-dihydro-2H-1,4-benzo[b]thiazine derivatives via DABCO-catalyzed one-pot three-component condensation reactions
Source: Royal Society of Chemistry journal article supplement (doi:10.1039/c3ra00123g), 2013-01-01
Supplement: c3ra00123g.pdf [file c3ra00123g.pdf]

## The Supporting Information

### Synthesis of 3,4-Dihydro-2*H*-1,4-Benzo[*b*]thiazine Derivatives via DABCO-Catalyzed One-Pot Three-Component Condensation Reactions

Jiaping Wu, Yongjia Shang,\* Cuie Wang, Xinwei He, Zhenglei Yan, Manman Hu, Fuyin Zhou

*Key Laboratory of Functional Molecular Solids, Ministry of Education, Anhui Key Laboratory of Molecule-Based Materials, College of Chemistry and Materials Science, Anhui Normal University, Wuhu 241000, P. R. China*

[shyj@mail.ahnu.edu.cn](mailto:shyj@mail.ahnu.edu.cn)

| Contents:                                                                 | pages   |
|---------------------------------------------------------------------------|---------|
| Table                                                                     | of      |
| contents .....                                                            | S1      |
| <sup>1</sup> H and <sup>13</sup> C NMR spectra of all products .....      | S2-P35  |
| Crystal data and structure refinement for <b>4fb</b> and <b>4ec</b> ..... | S36-P44 |

### $^1\text{H}$ and $^{13}\text{C}$ NMR spectra of 4aa

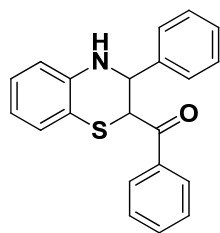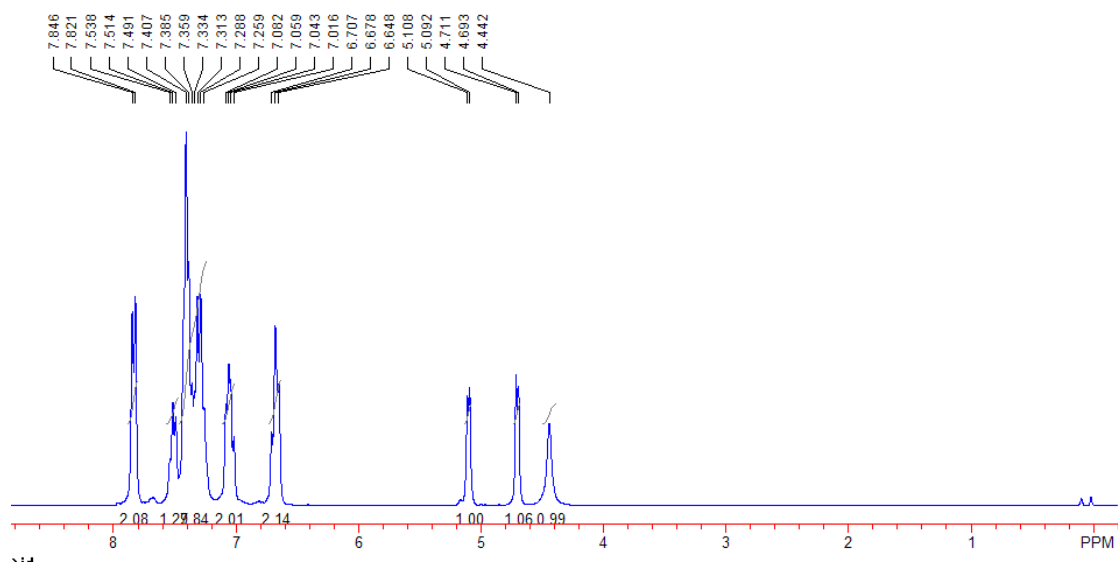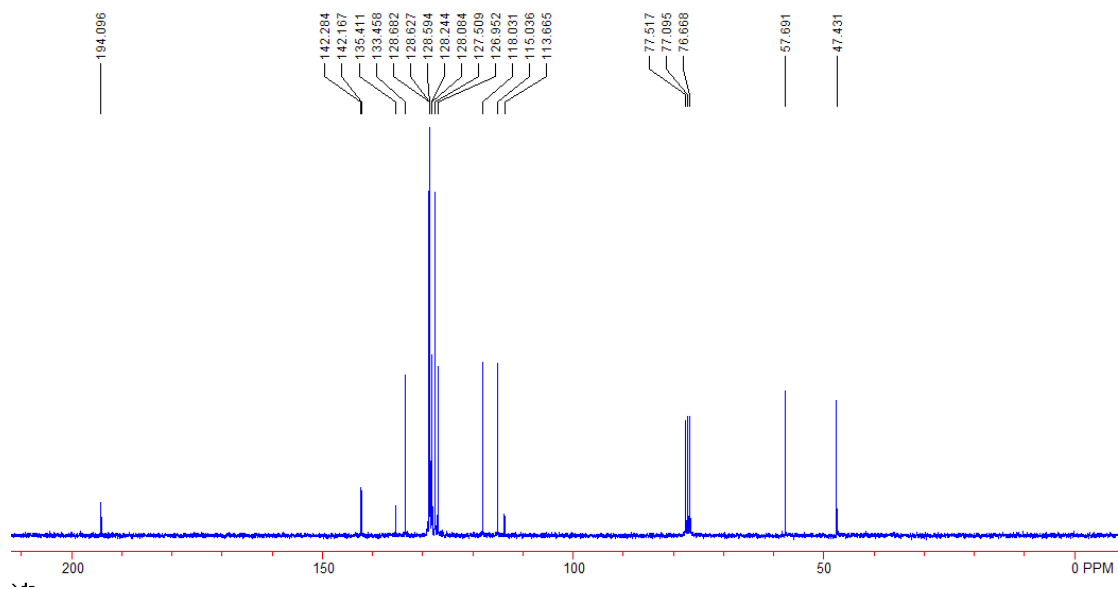

### $^1\text{H}$ and $^{13}\text{C}$ NMR spectra of 4ab

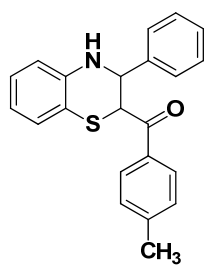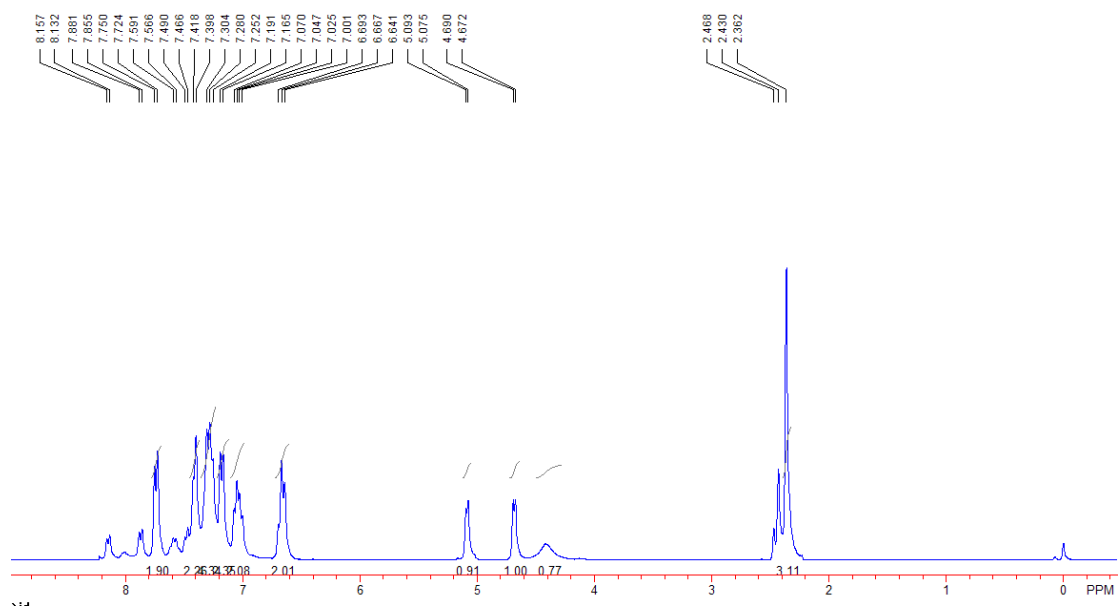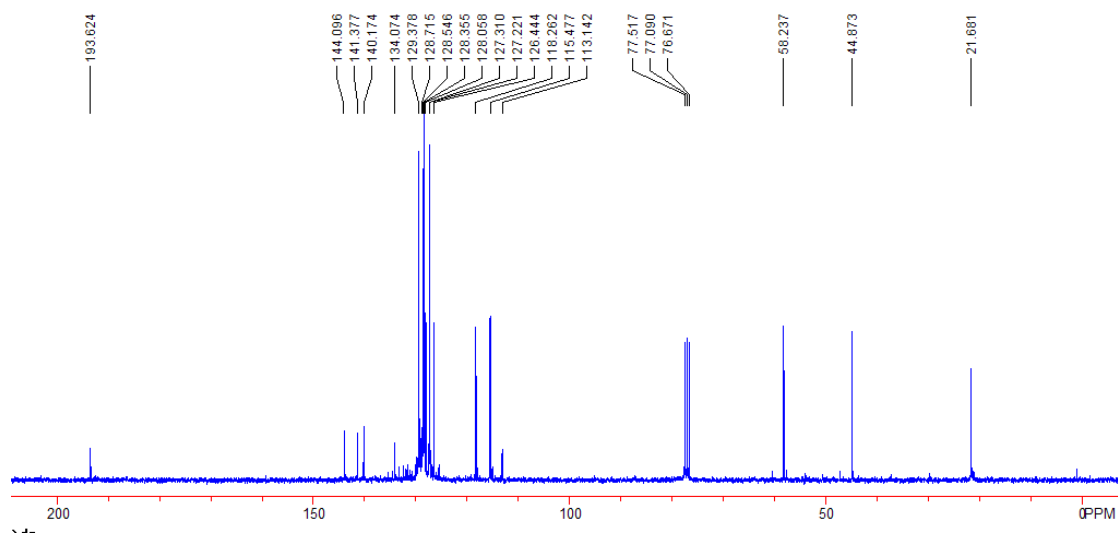

### $^1\text{H}$ and $^{13}\text{C}$ NMR spectra of 4ac

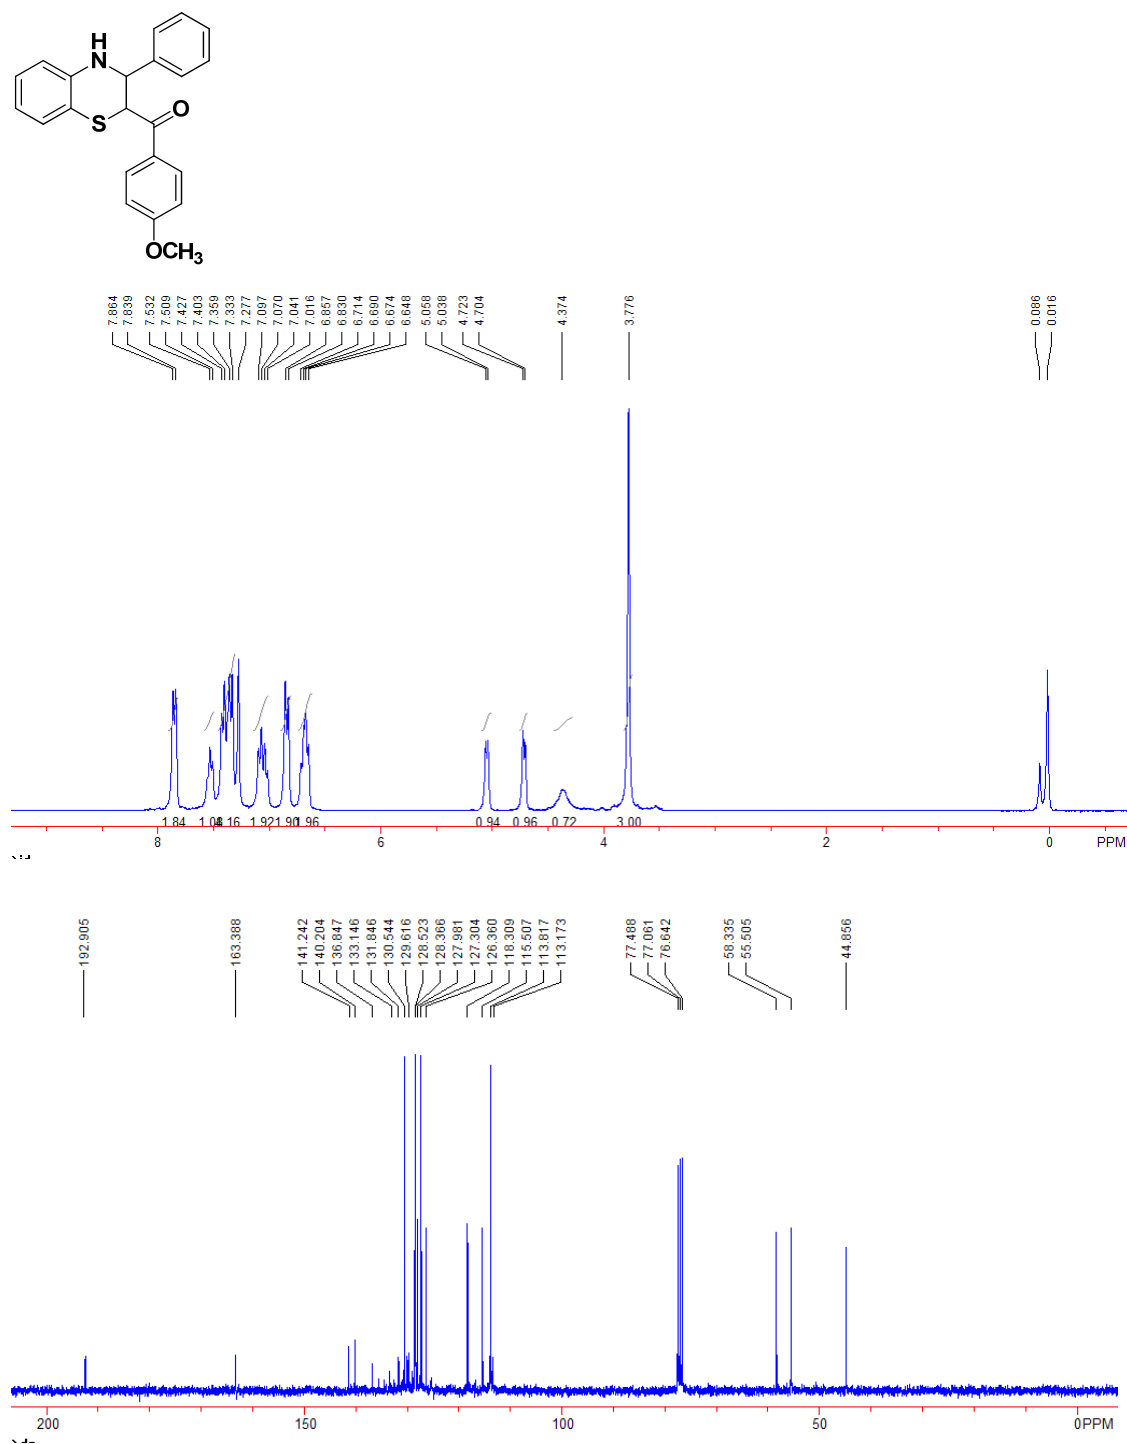

### $^1\text{H}$ and $^{13}\text{C}$ NMR spectra of 4ad

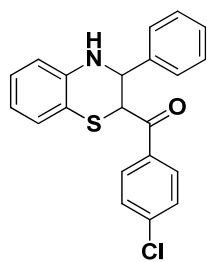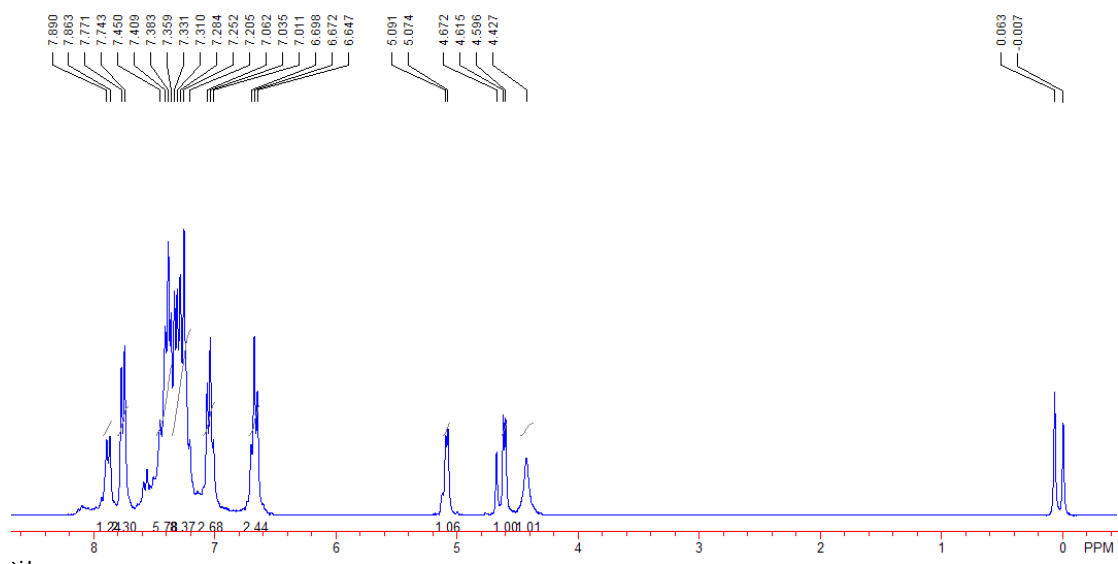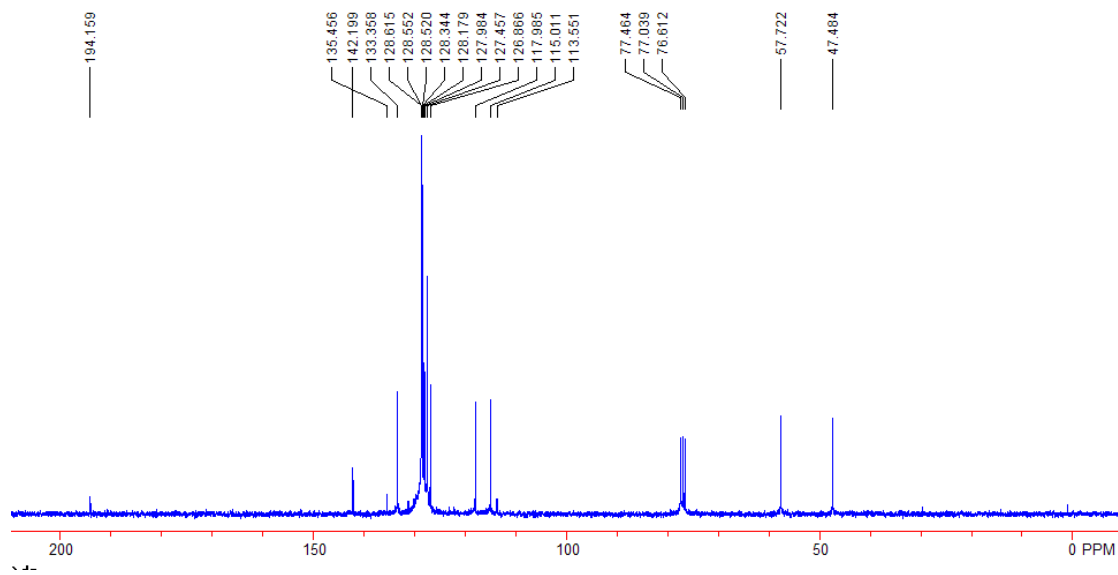

### <sup>1</sup>H and <sup>13</sup>C NMR spectra of 4ba

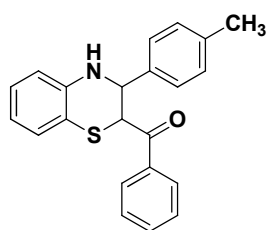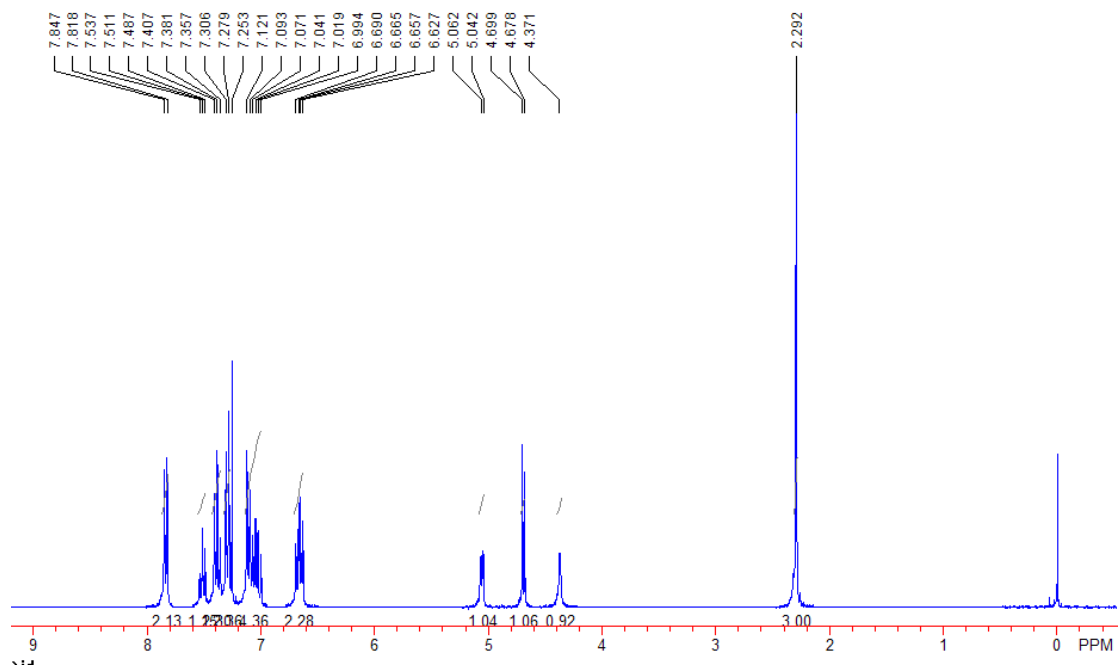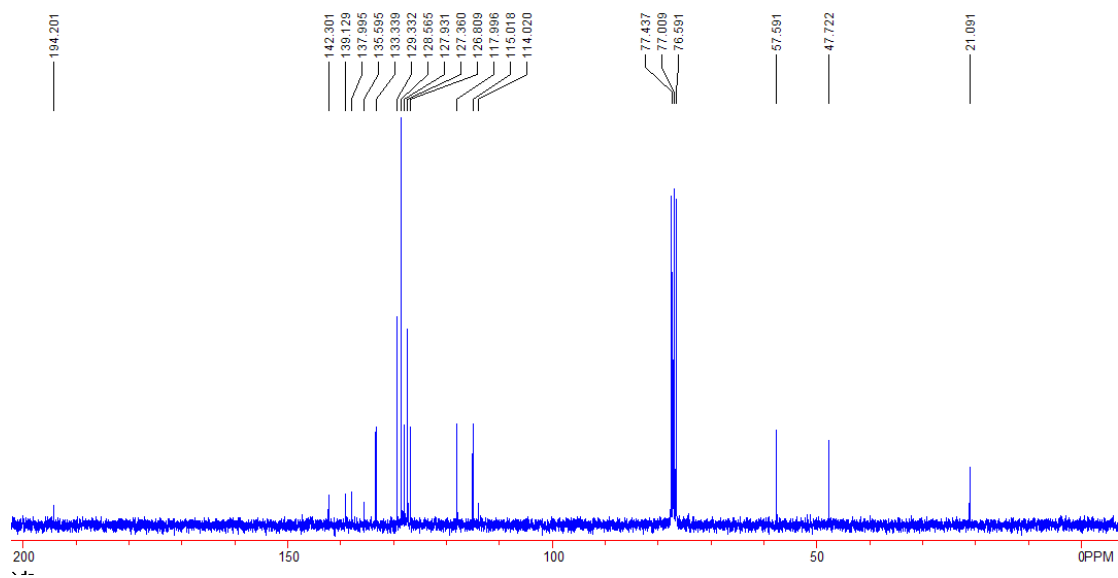

### $^1\text{H}$ and $^{13}\text{C}$ NMR spectra of 4bb

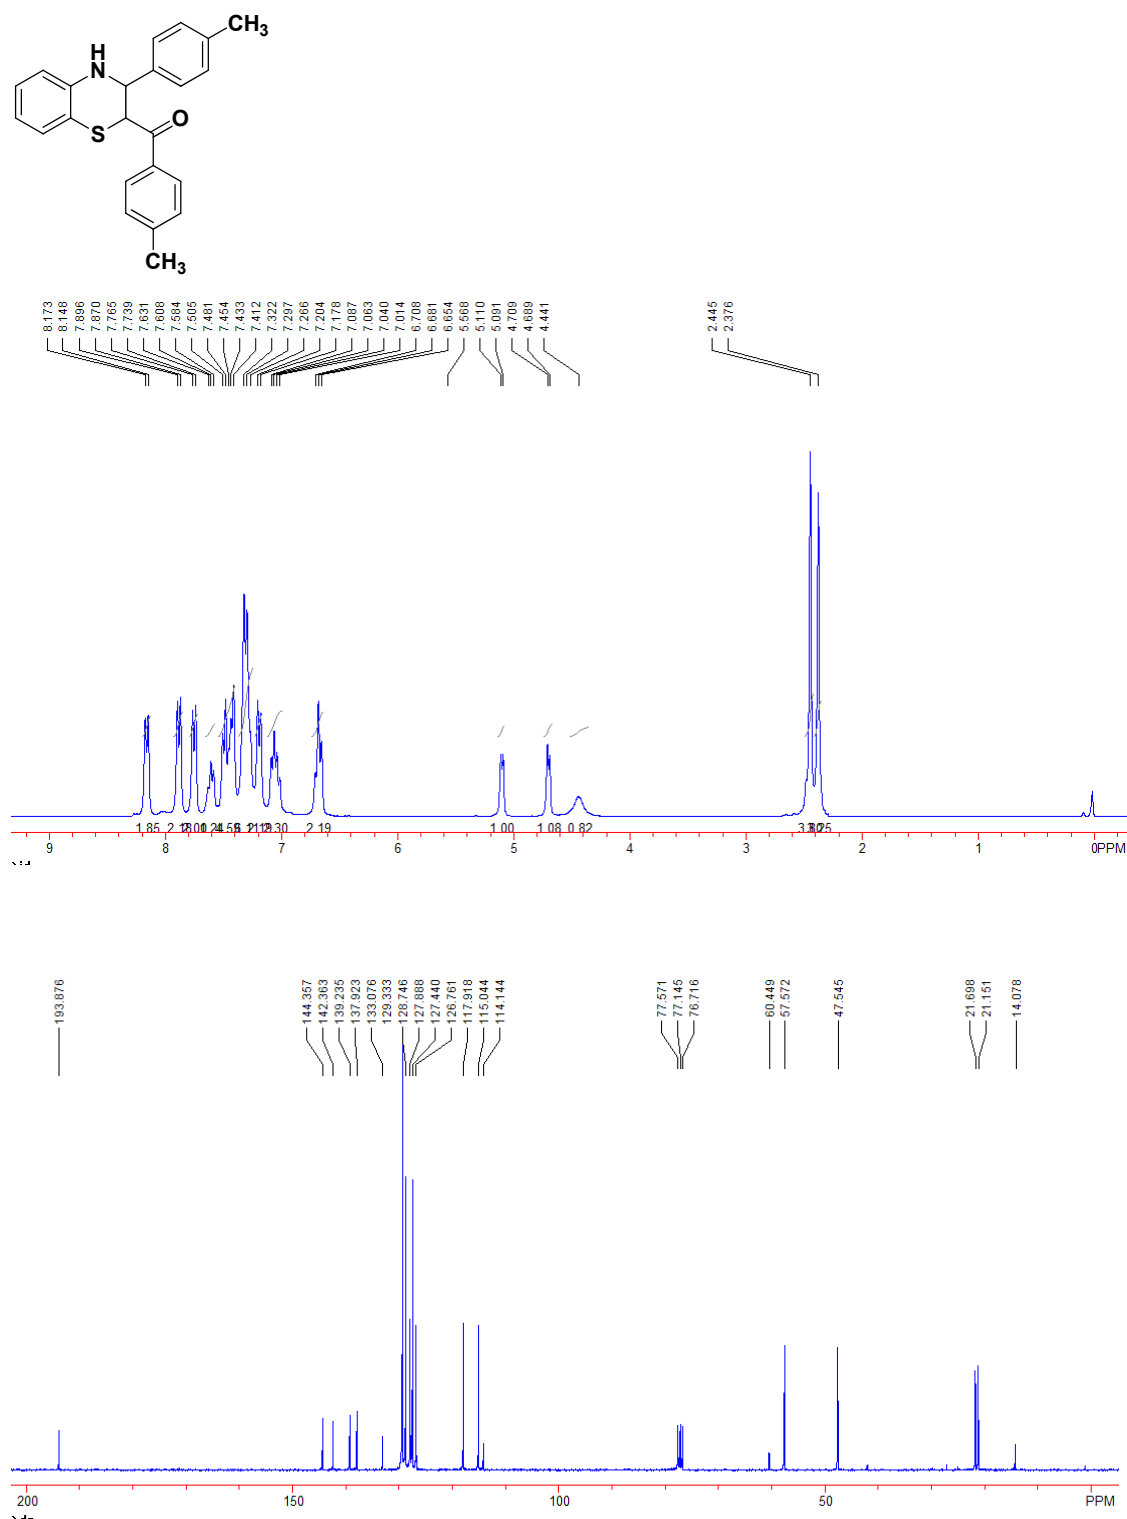

### <sup>1</sup>H and <sup>13</sup>C NMR spectra of 4bc

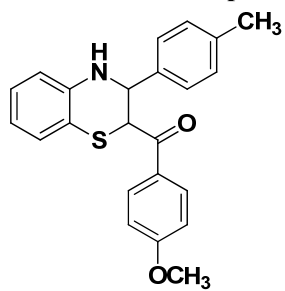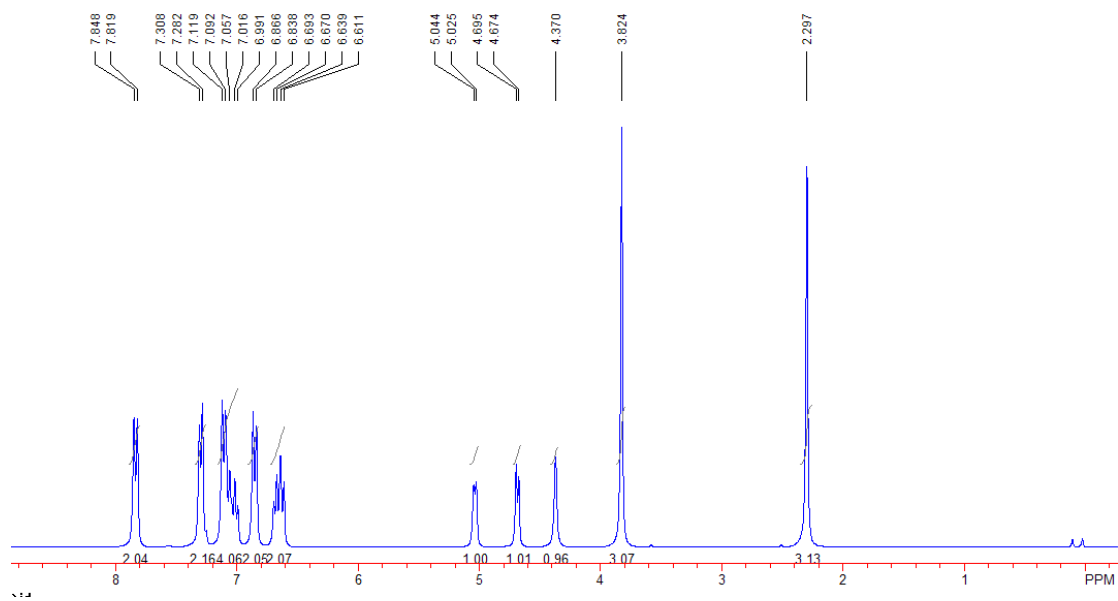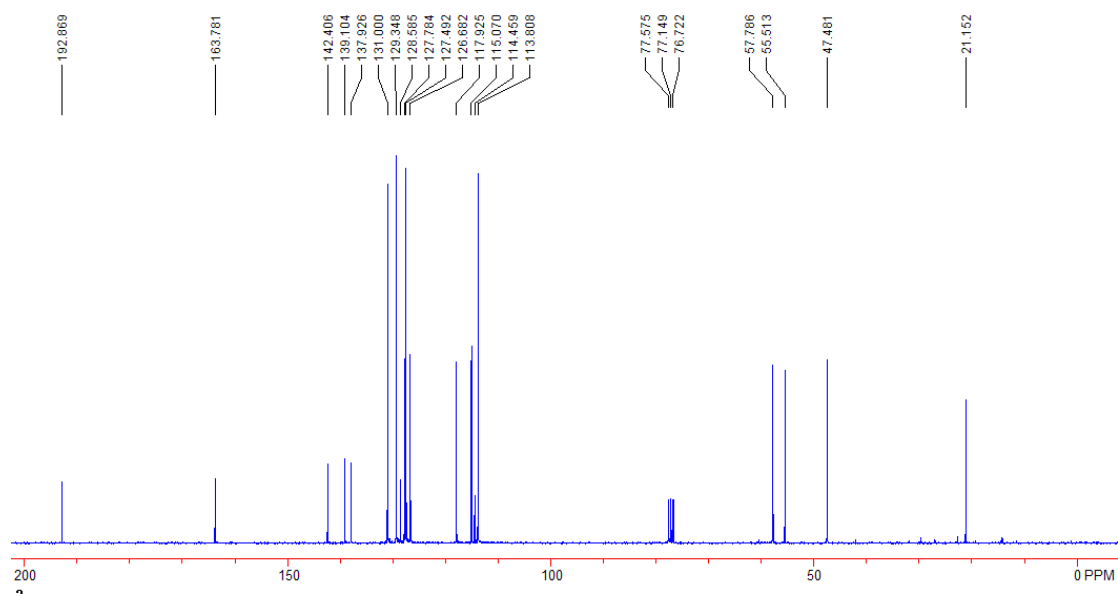



### $^1\text{H}$ and $^{13}\text{C}$ NMR spectra of 4bd

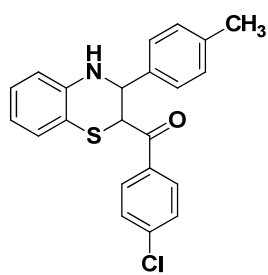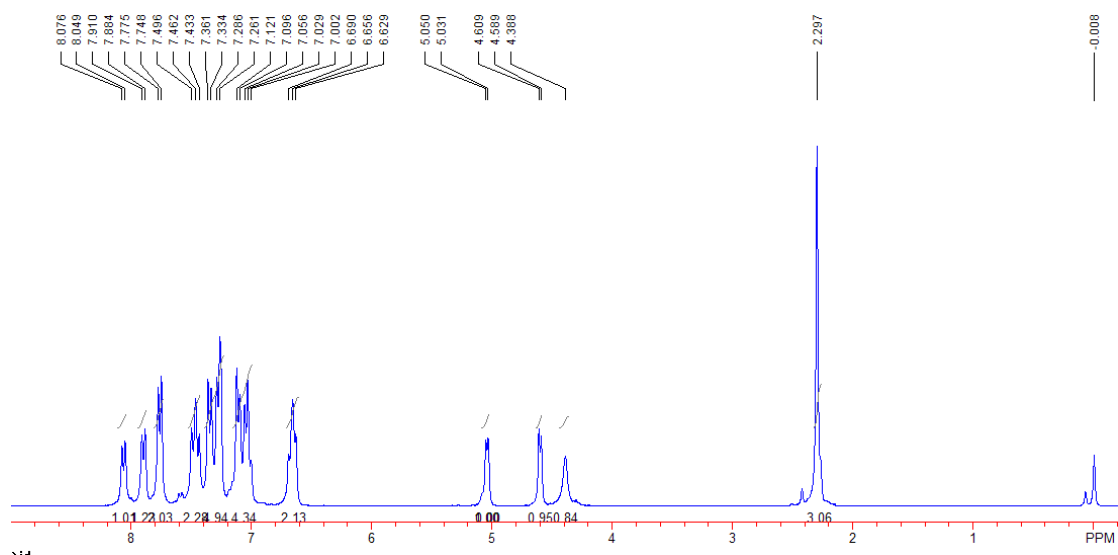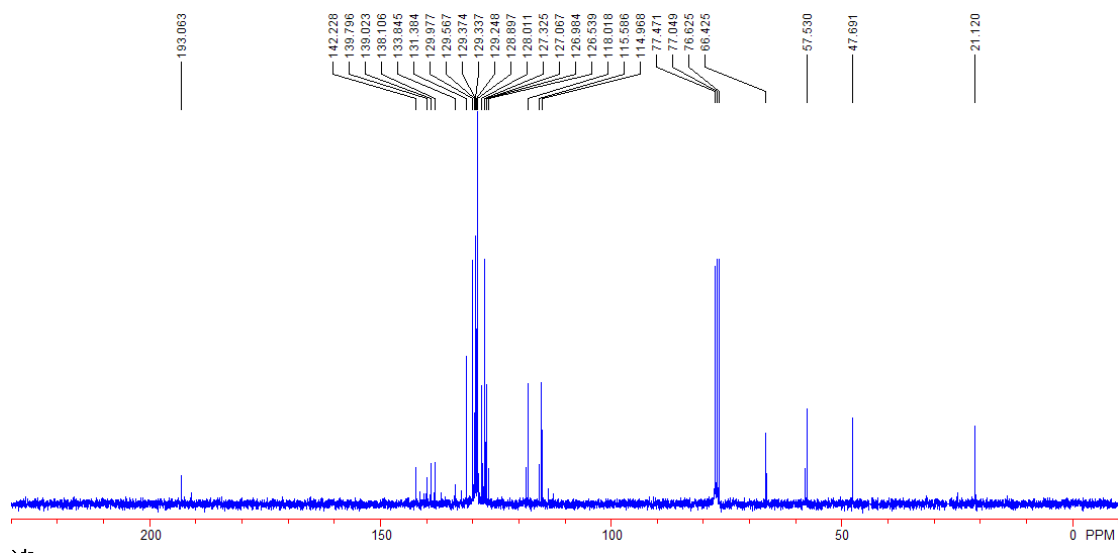

### $^1\text{H}$ and $^{13}\text{C}$ NMR spectra of 4be

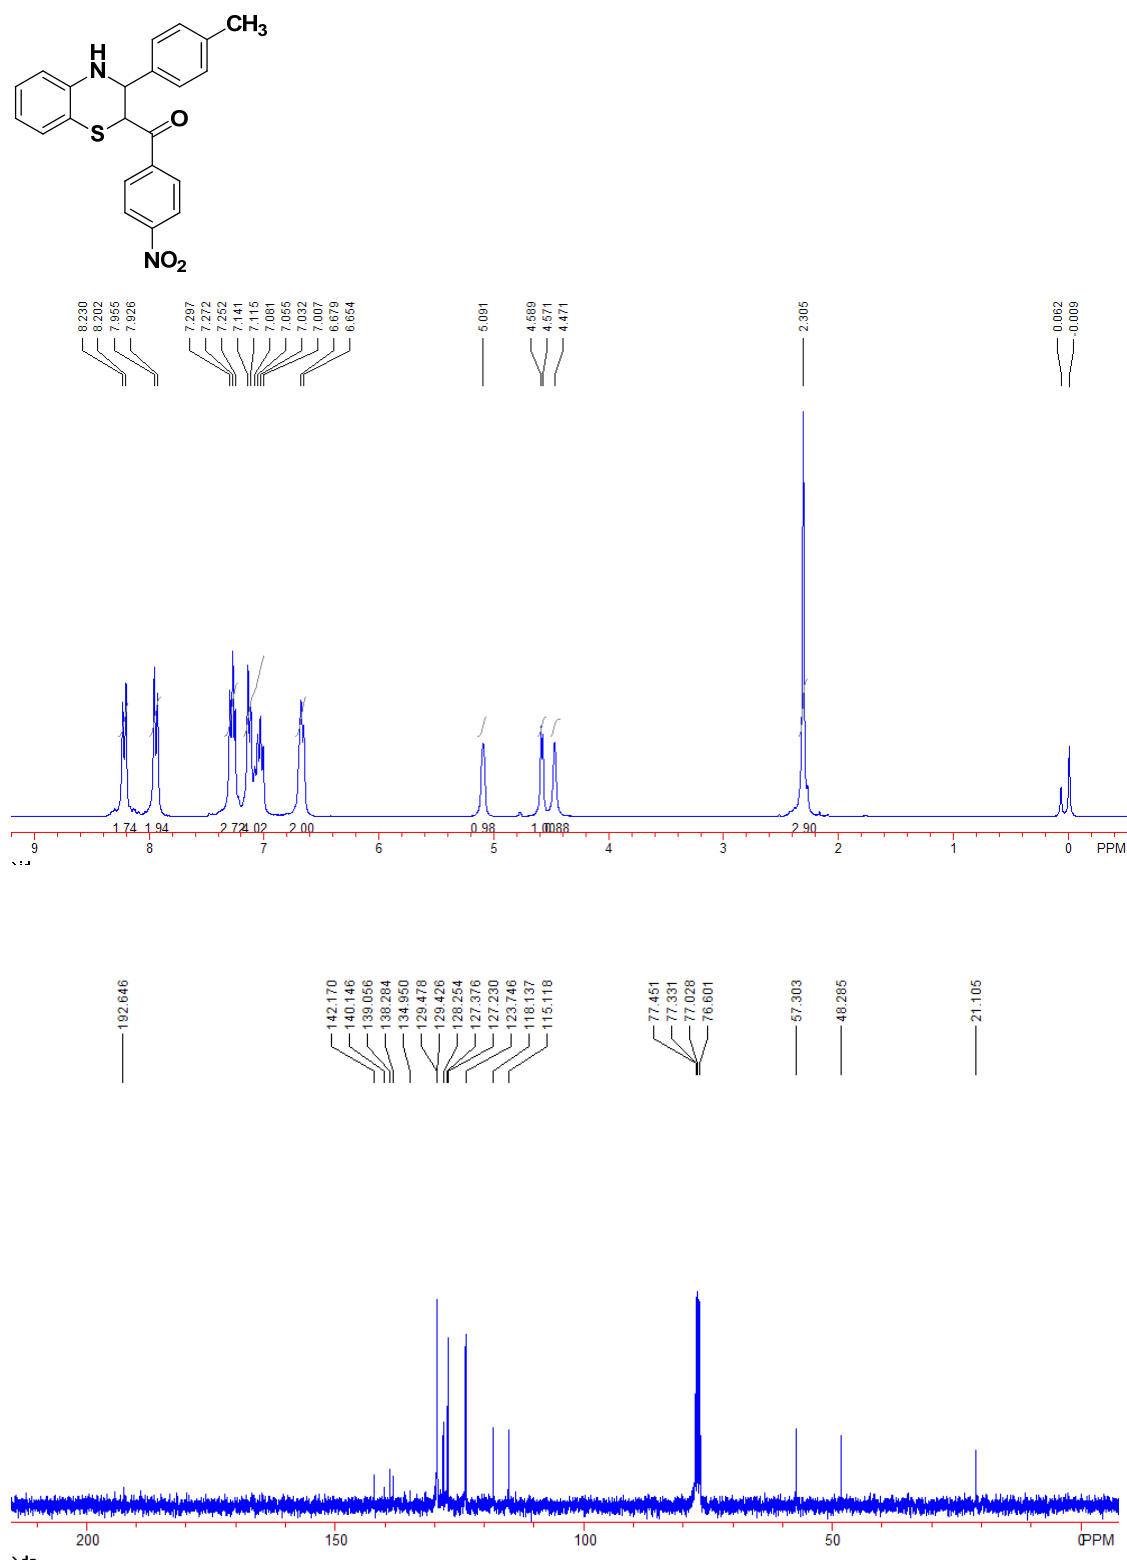

### <sup>1</sup>H and <sup>13</sup>C NMR spectra of 4ca

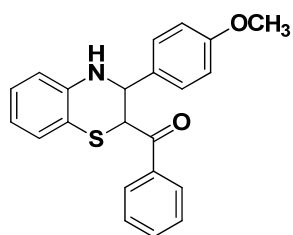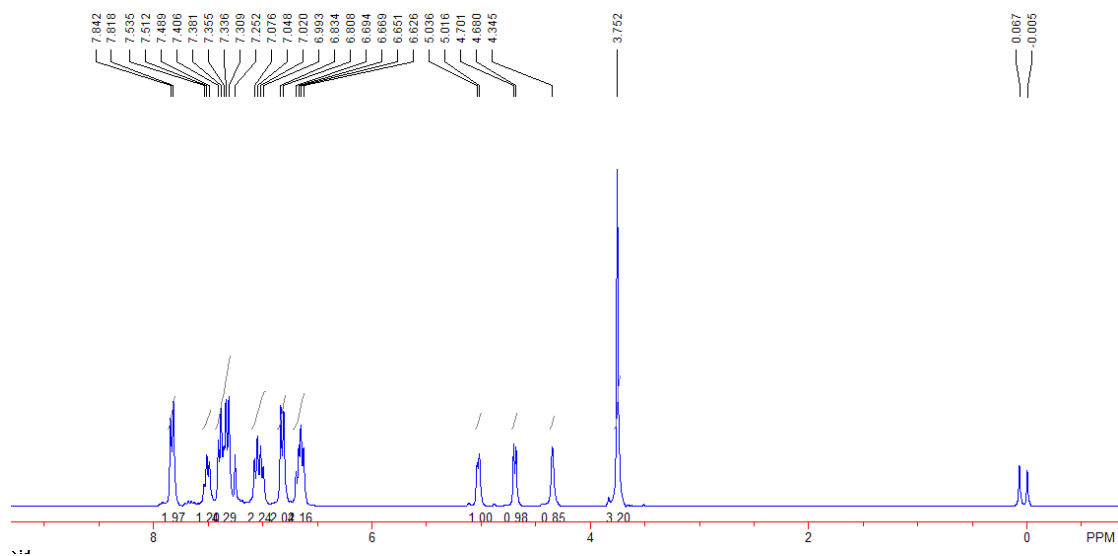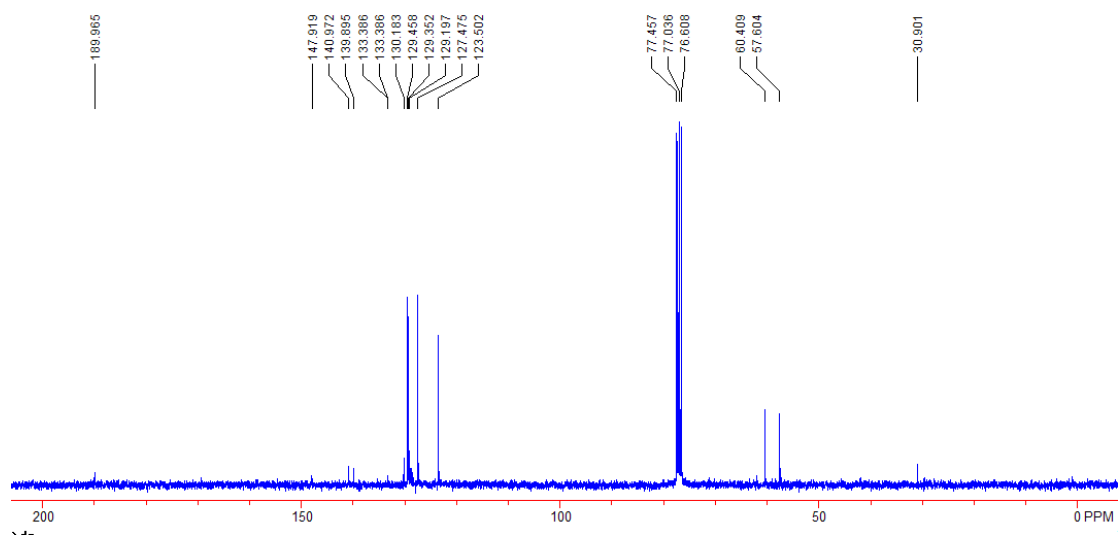

### $^1\text{H}$ and $^{13}\text{C}$ NMR spectra of 4cb

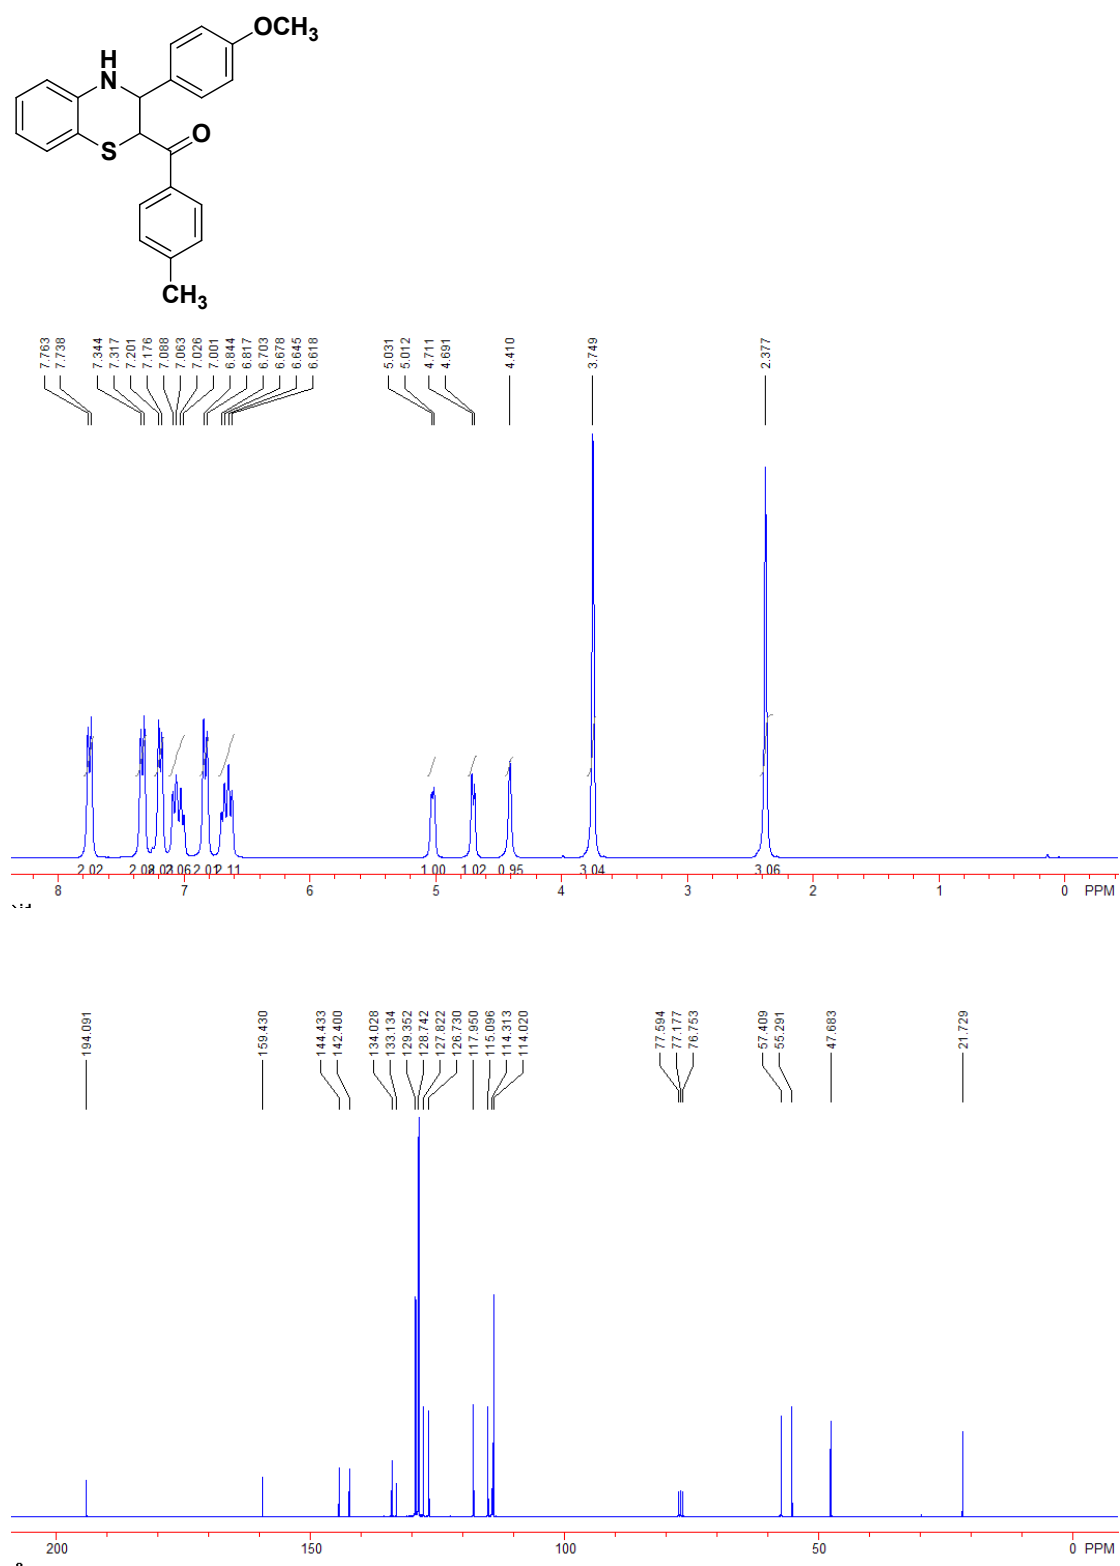

### $^1\text{H}$ and $^{13}\text{C}$ NMR spectra of 4cc

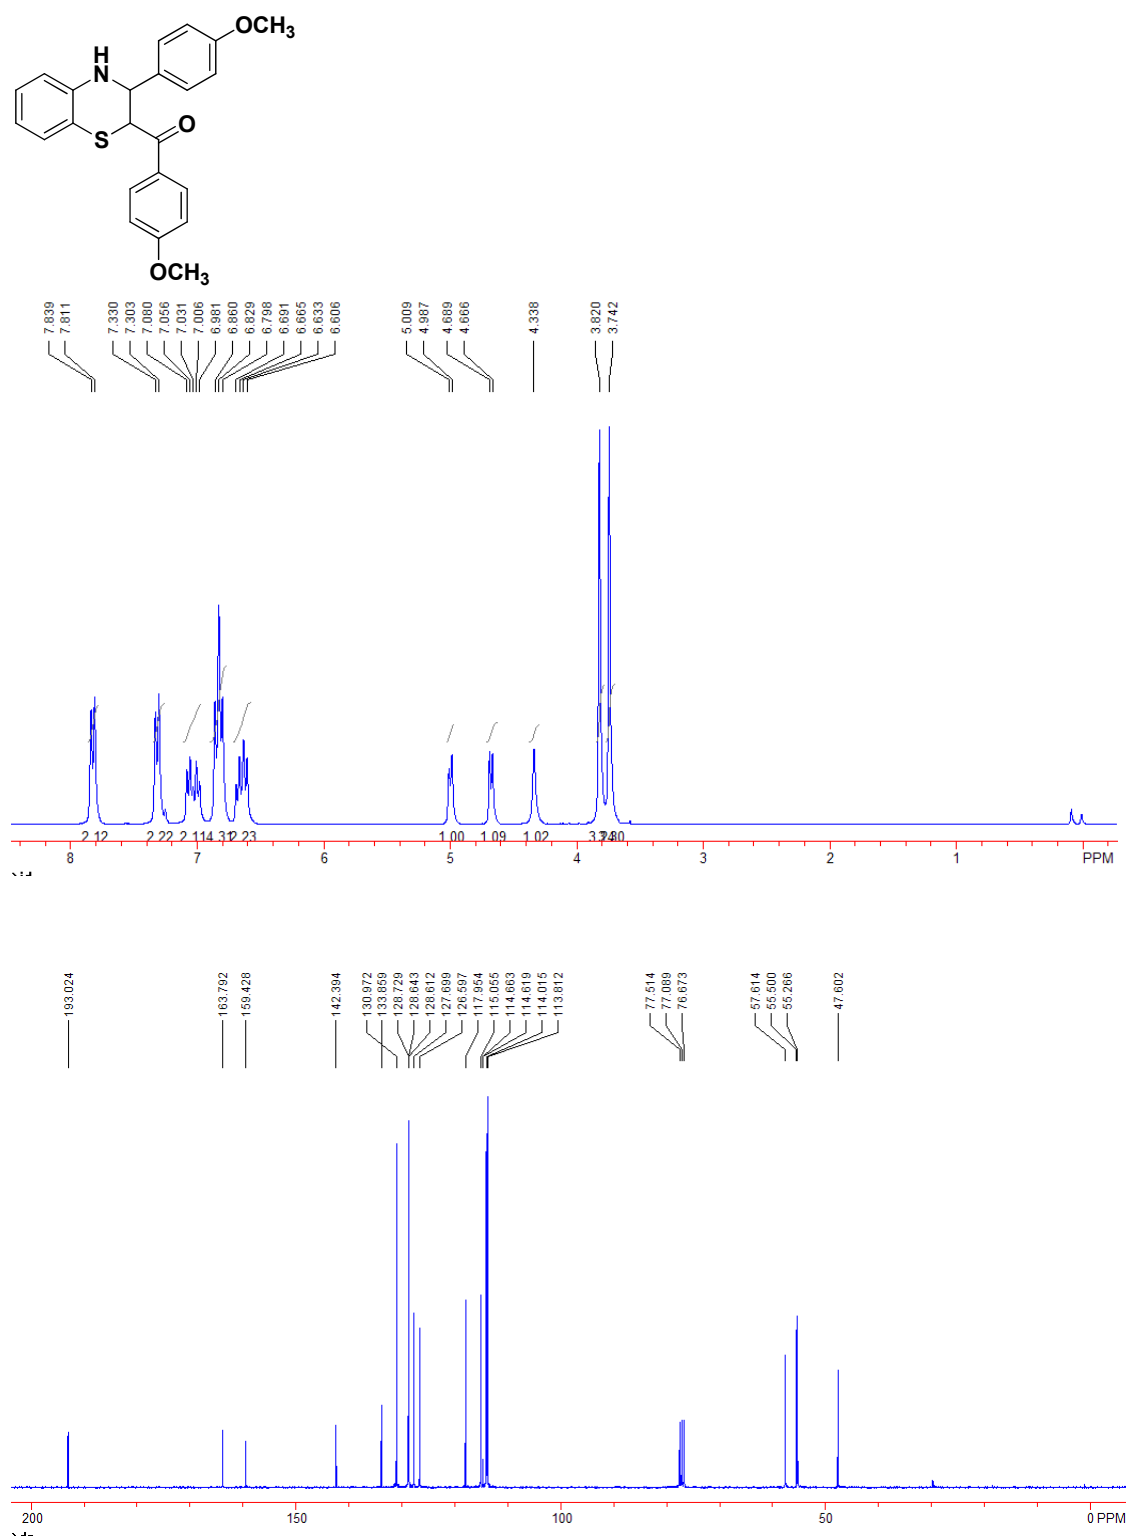

### $^1\text{H}$ and $^{13}\text{C}$ NMR spectra of 4cd

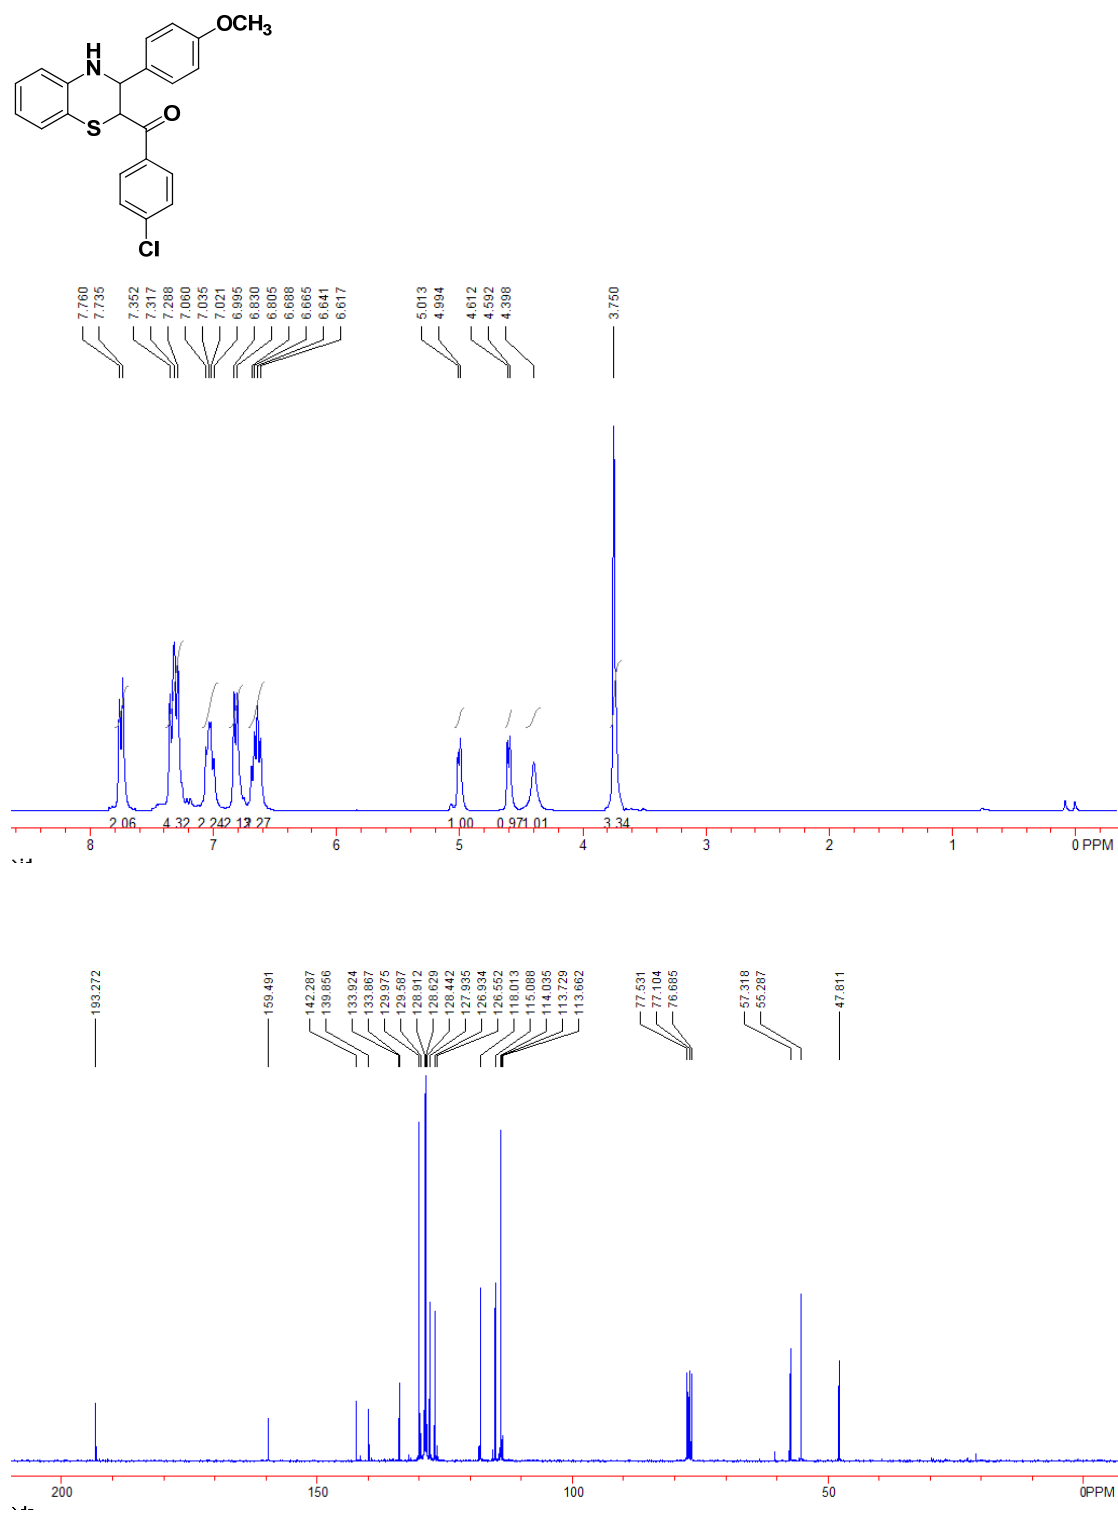

### $^1\text{H}$ and $^{13}\text{C}$ NMR spectra of 4ce

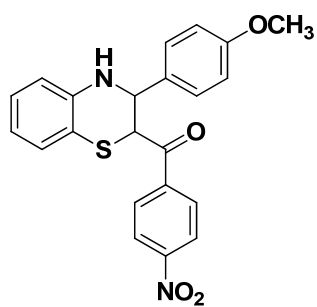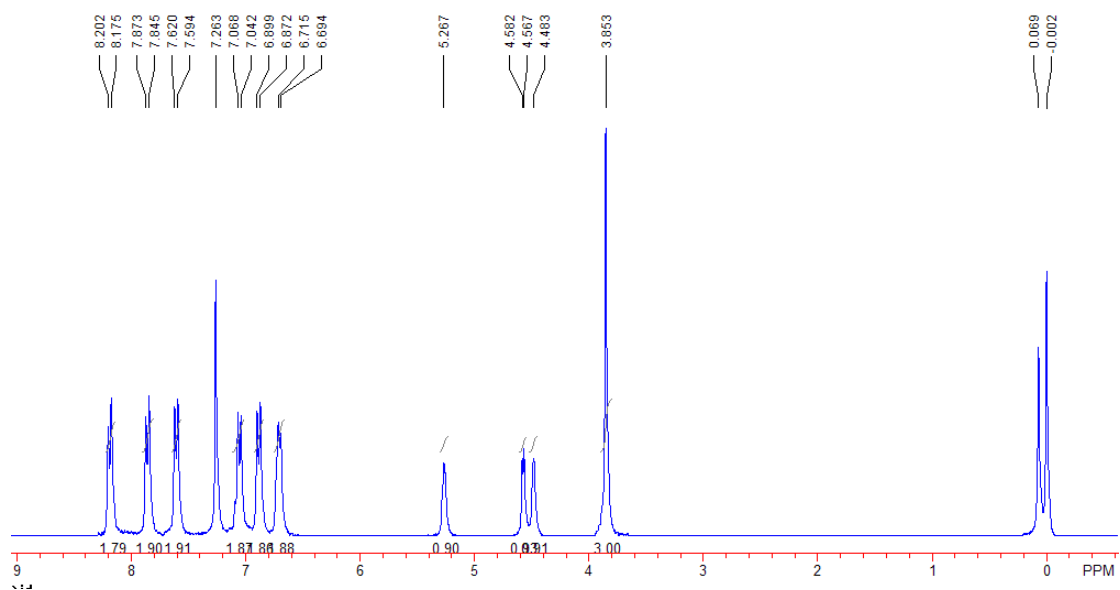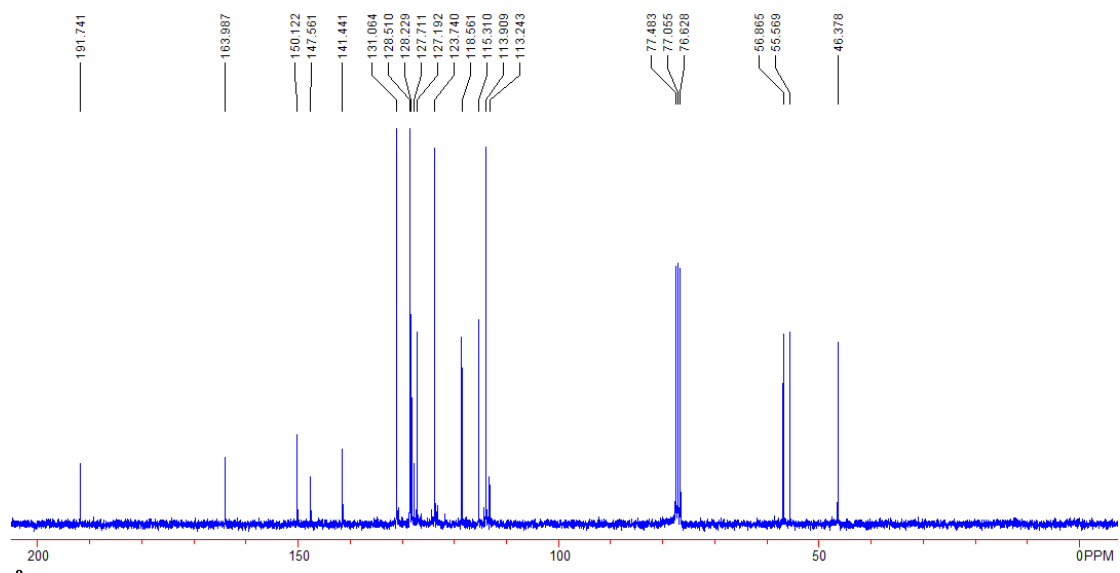

### $^1\text{H}$ and $^{13}\text{C}$ NMR spectra of 4da

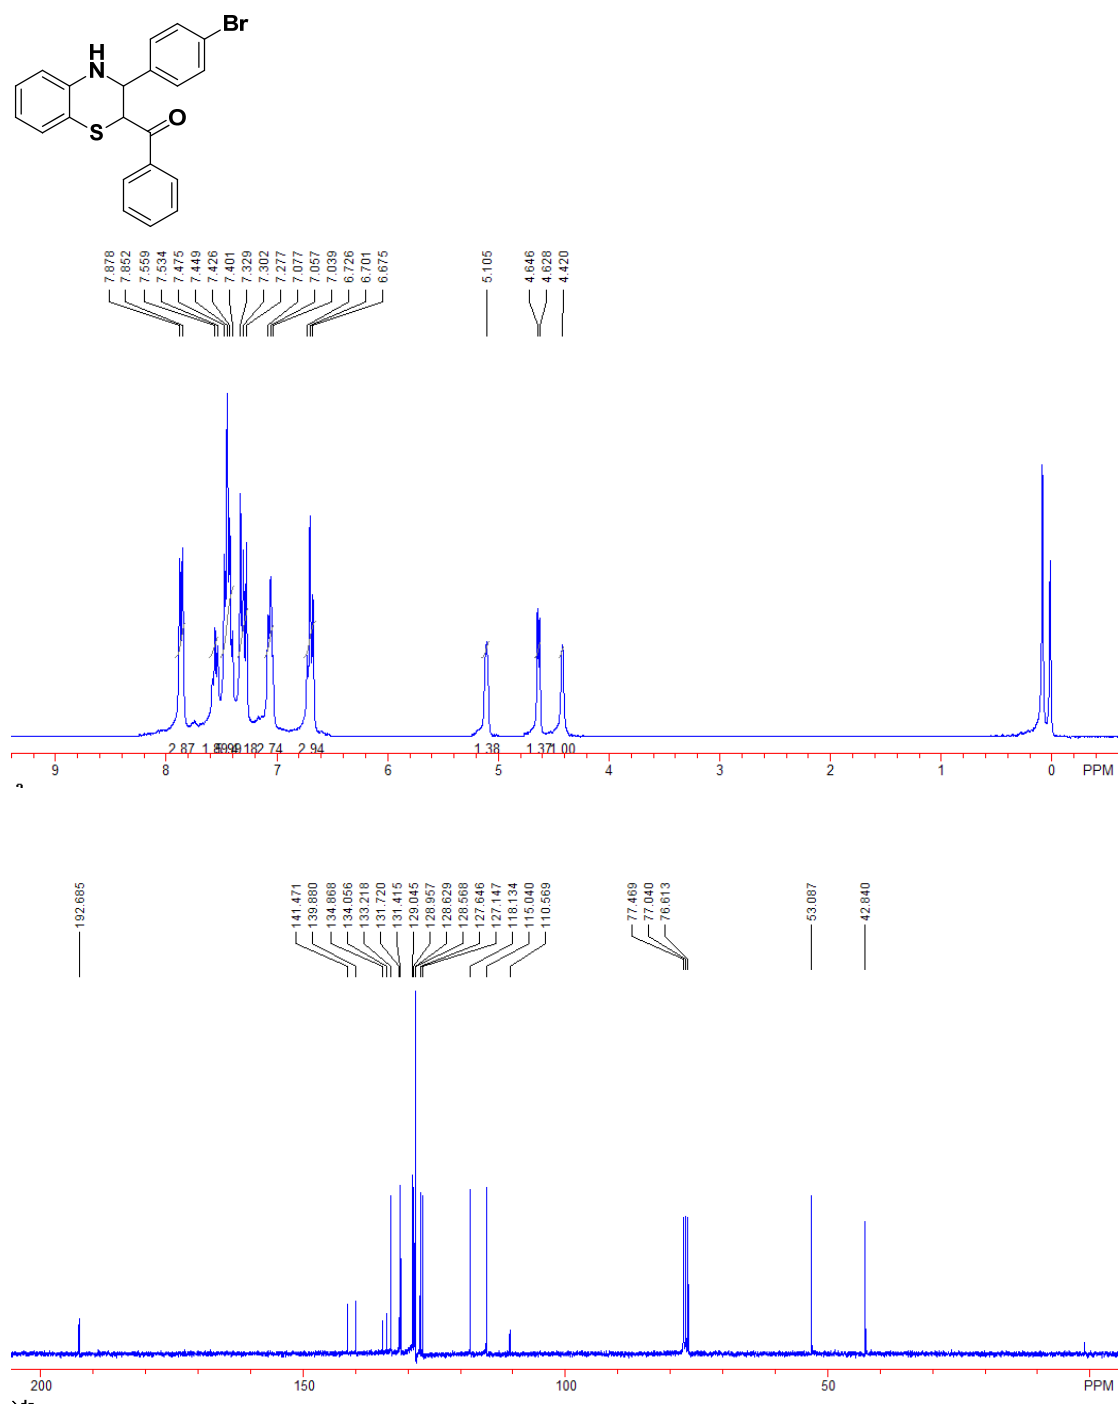



### $^1\text{H}$ and $^{13}\text{C}$ NMR spectra of 4db

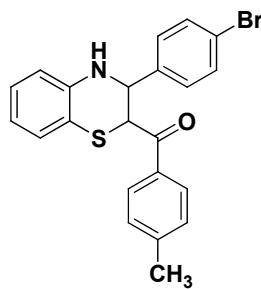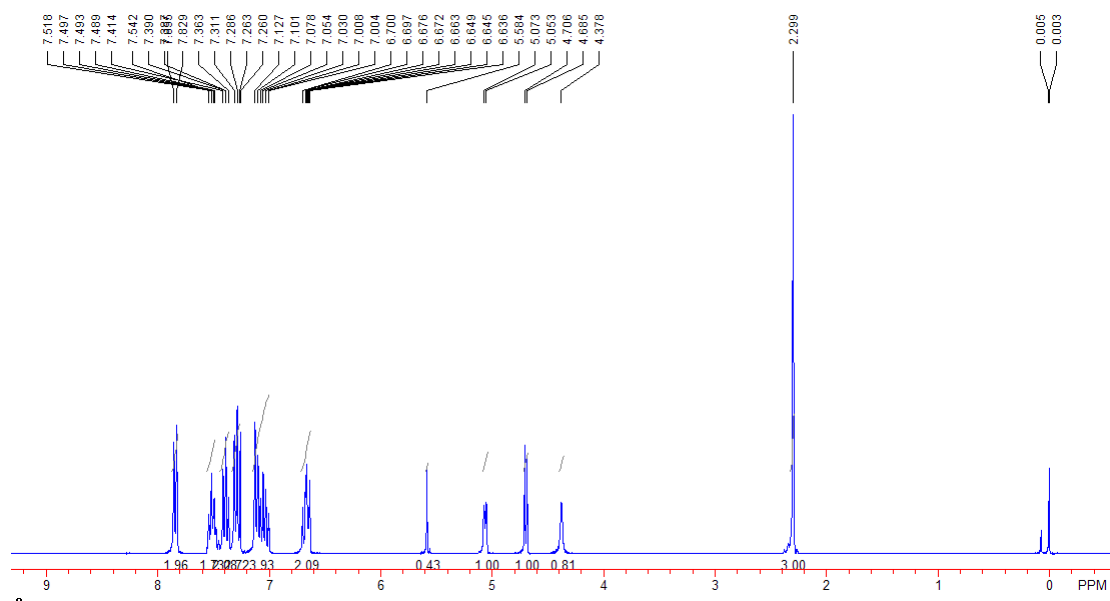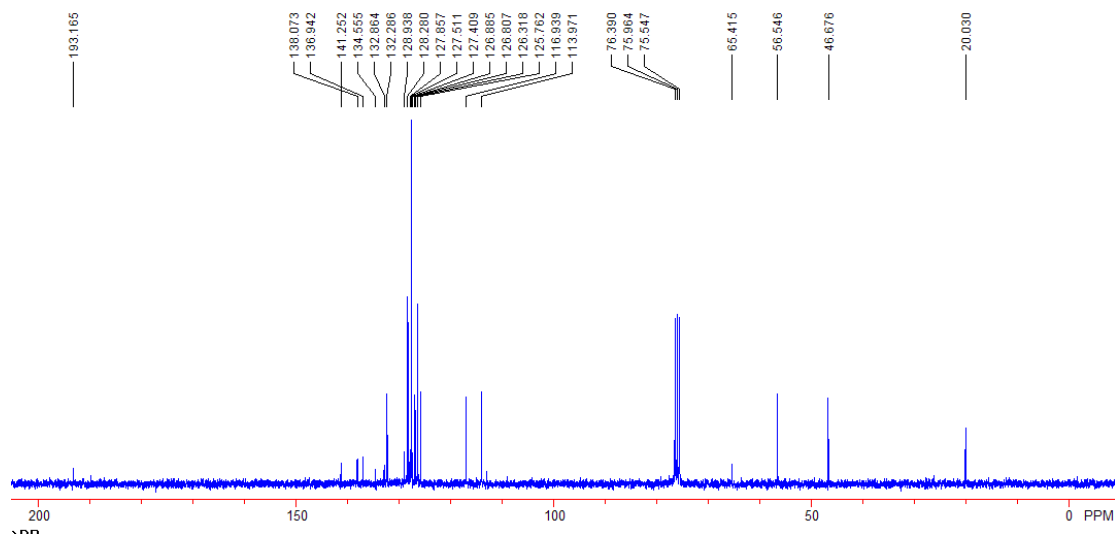

### $^1\text{H}$ and $^{13}\text{C}$ NMR spectra of 4dc

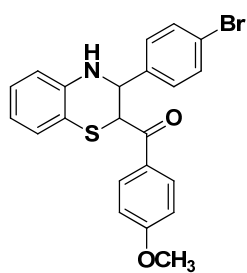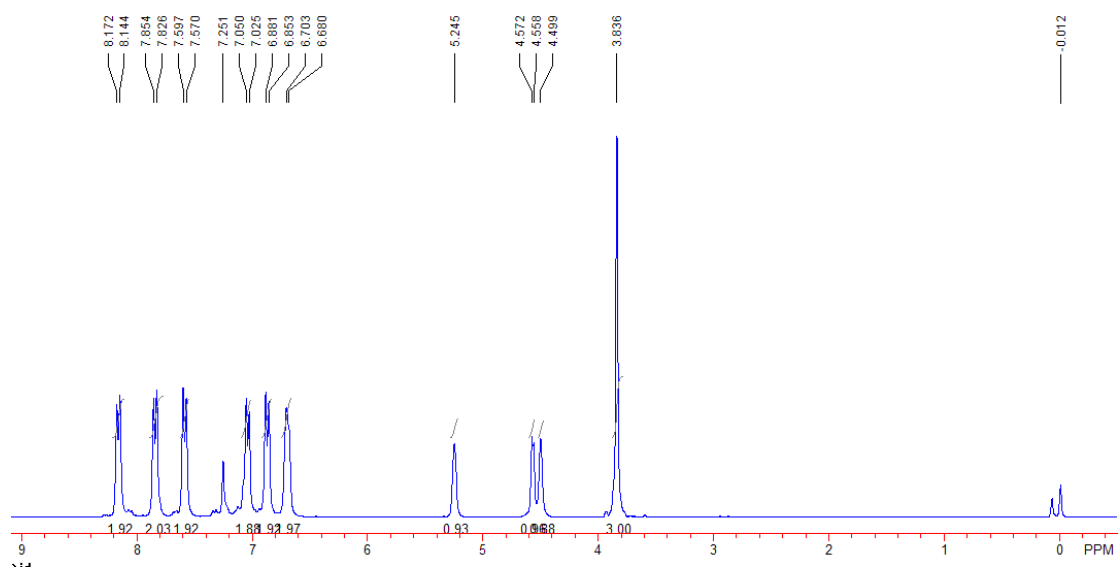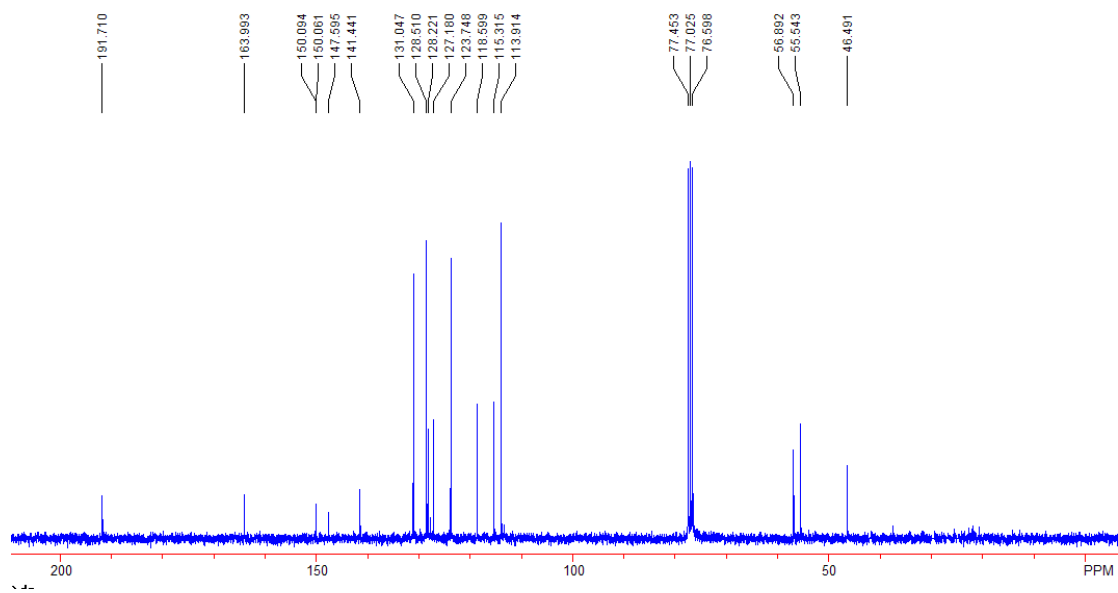

### $^1\text{H}$ and $^{13}\text{C}$ NMR spectra of 4dd

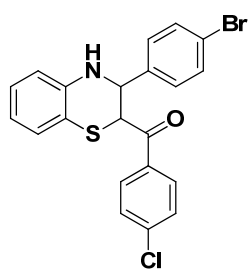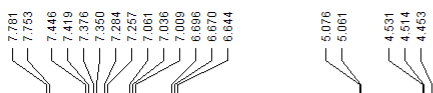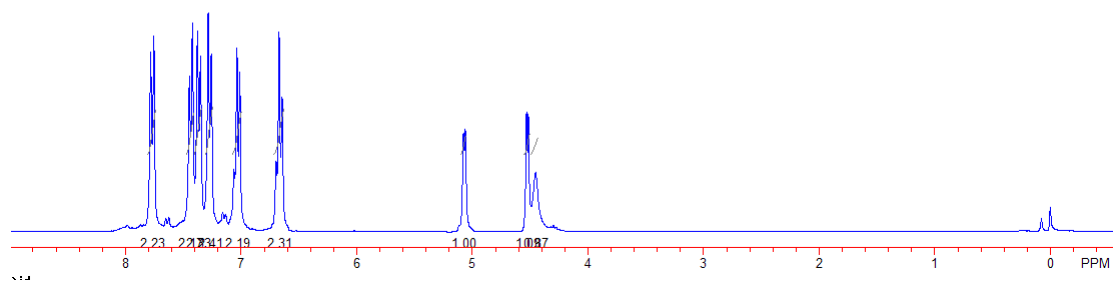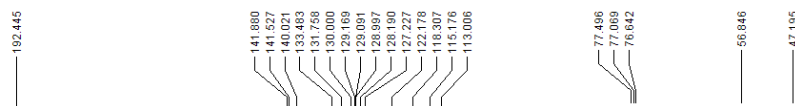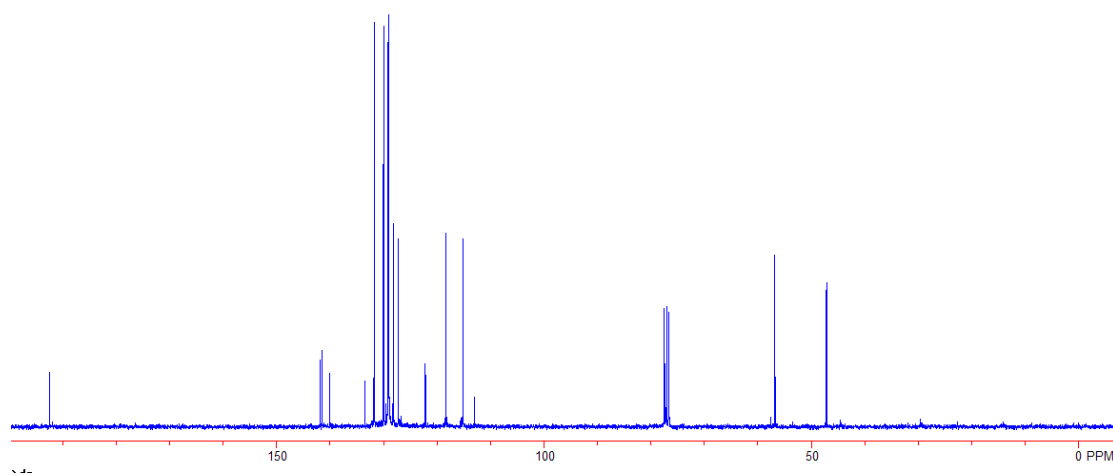

### $^1\text{H}$ and $^{13}\text{C}$ NMR spectra of 4de

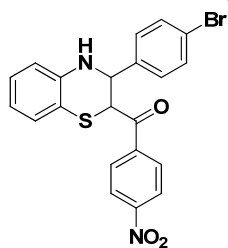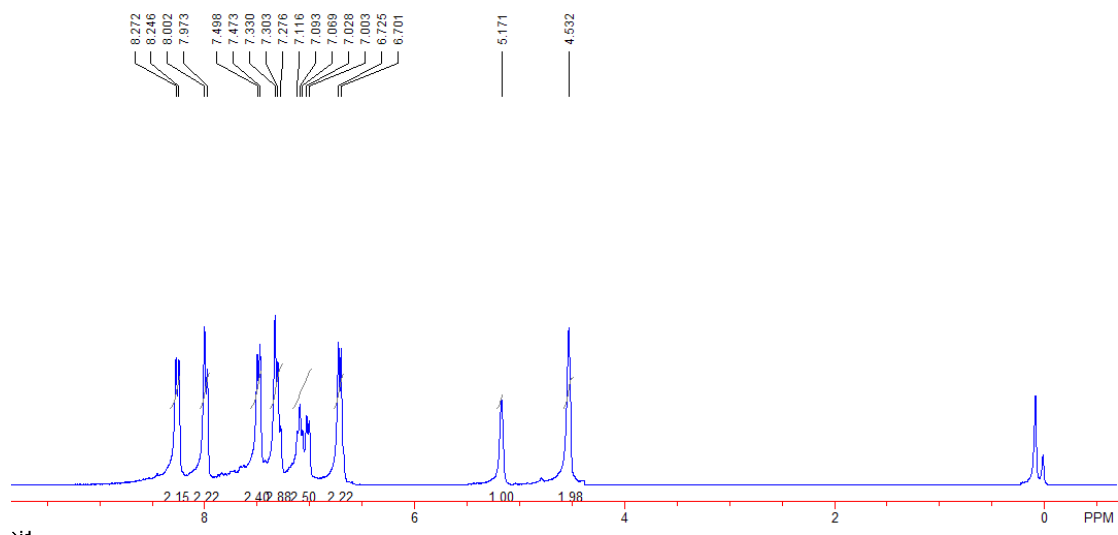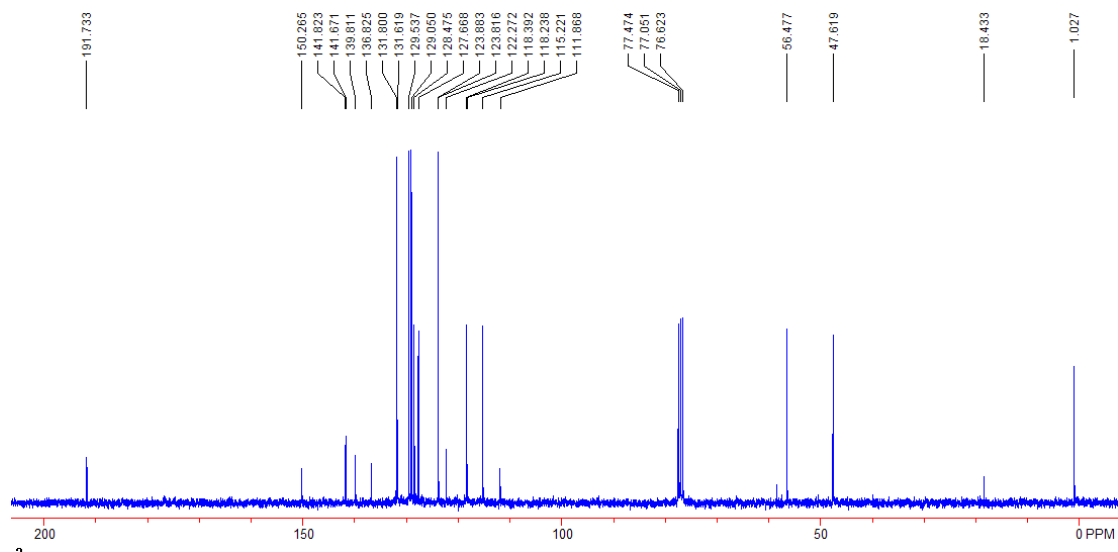

### $^1\text{H}$ and $^{13}\text{C}$ NMR spectra of 4ea

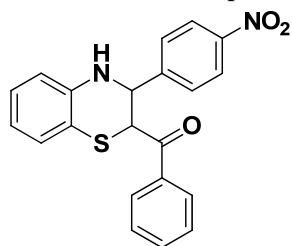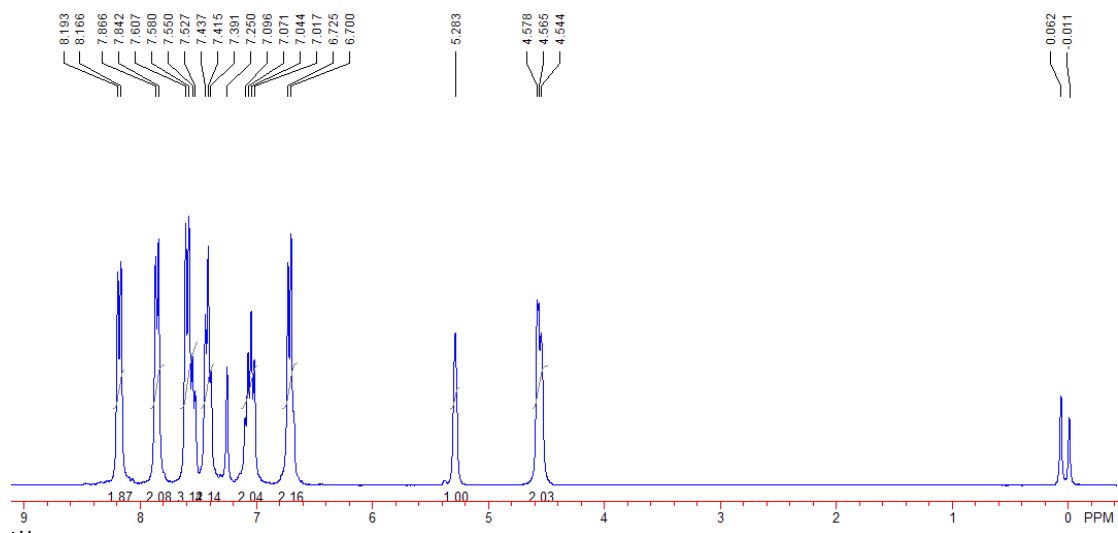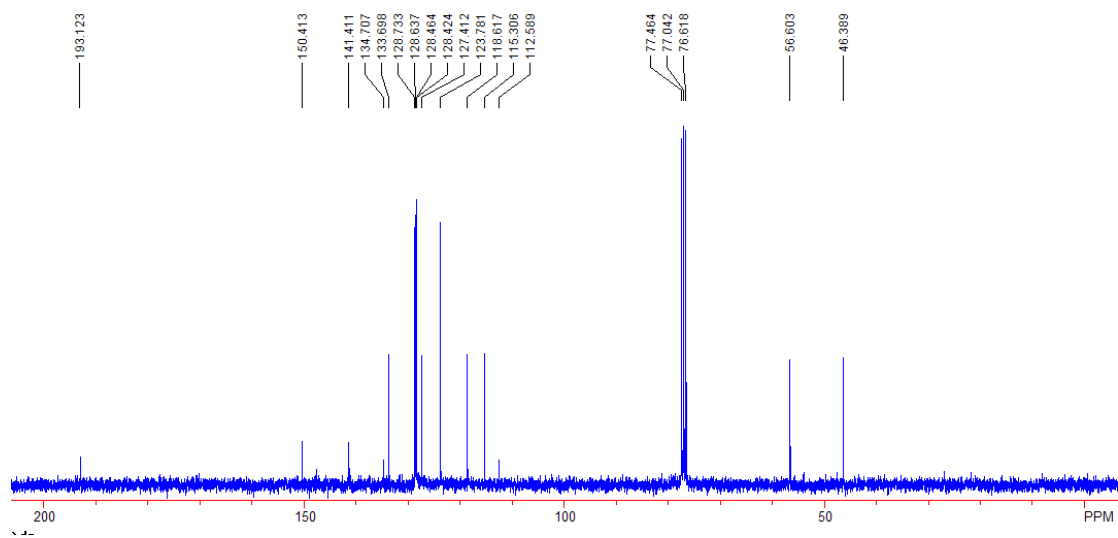

### <sup>1</sup>H and <sup>13</sup>C NMR spectra of 4eb

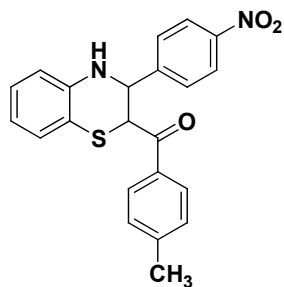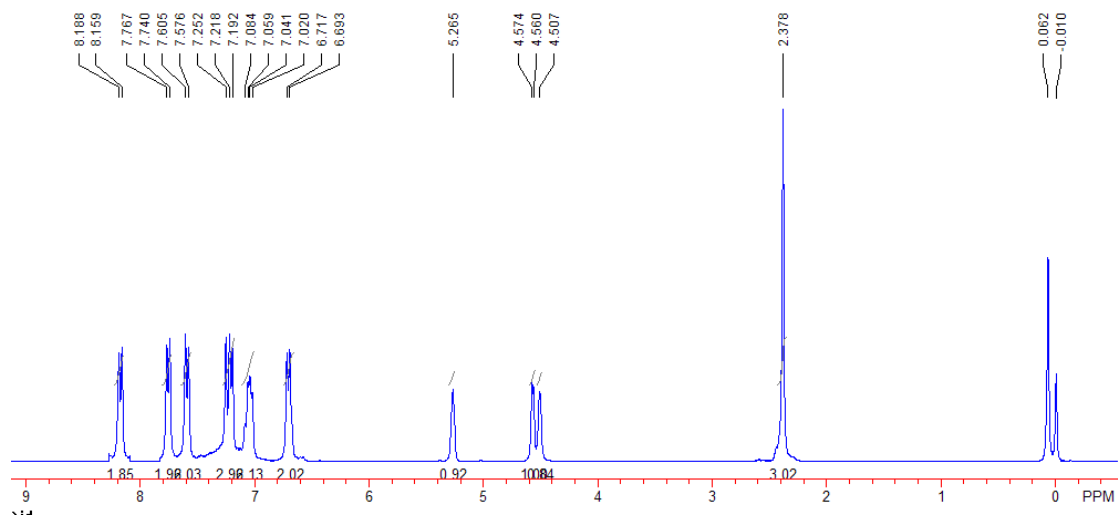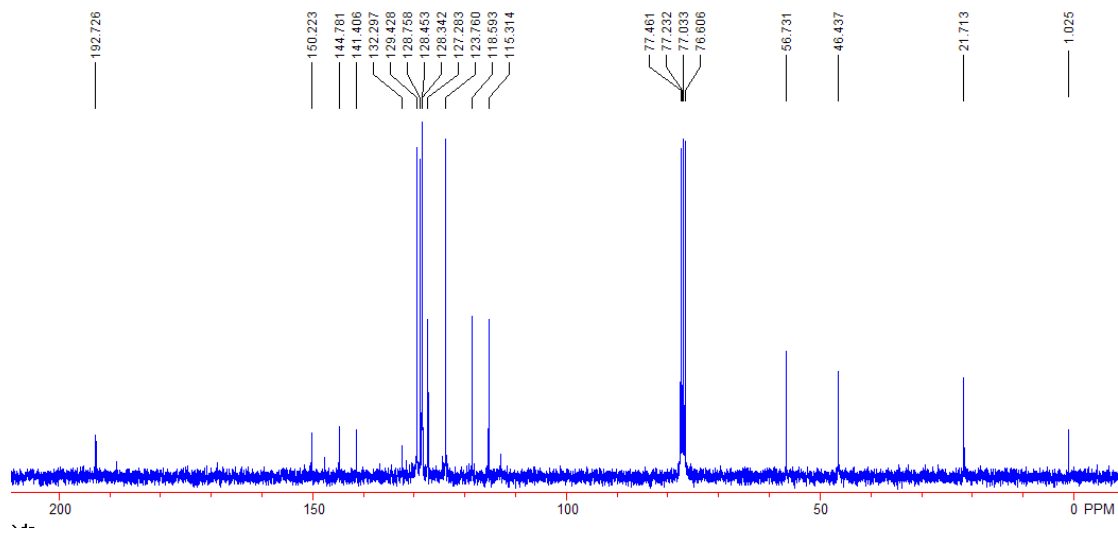

### <sup>1</sup>H and <sup>13</sup>C NMR spectra of 4ec

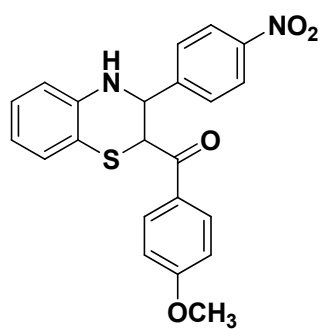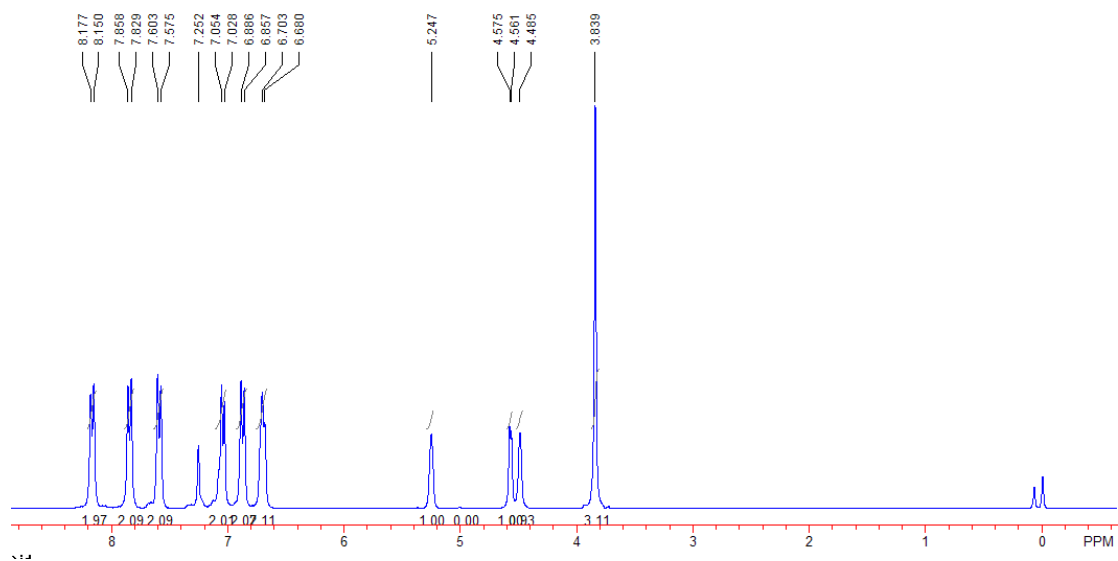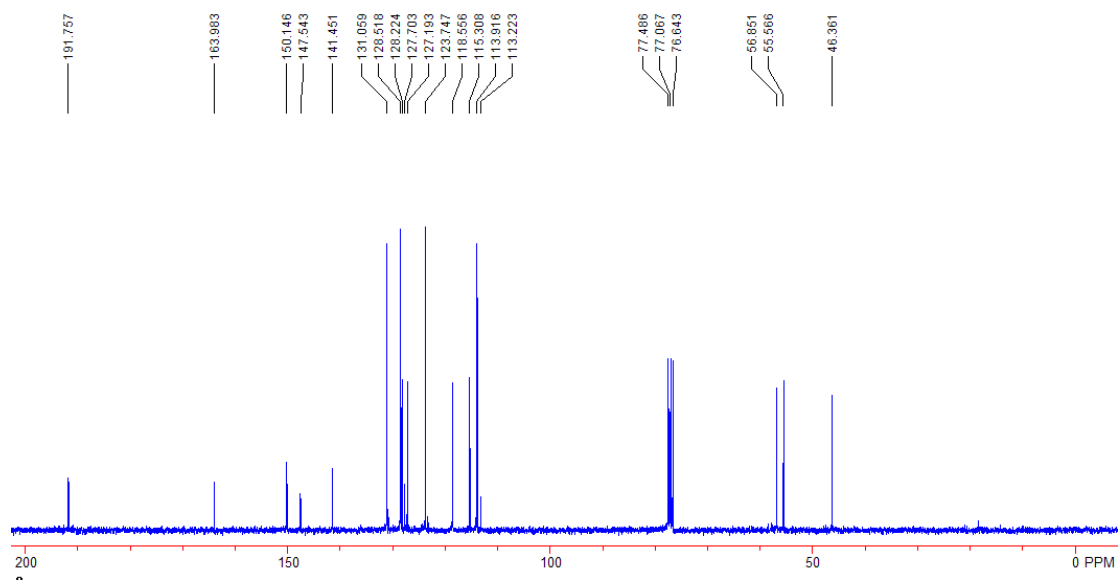

### $^1\text{H}$ and $^{13}\text{C}$ NMR spectra of 4ed

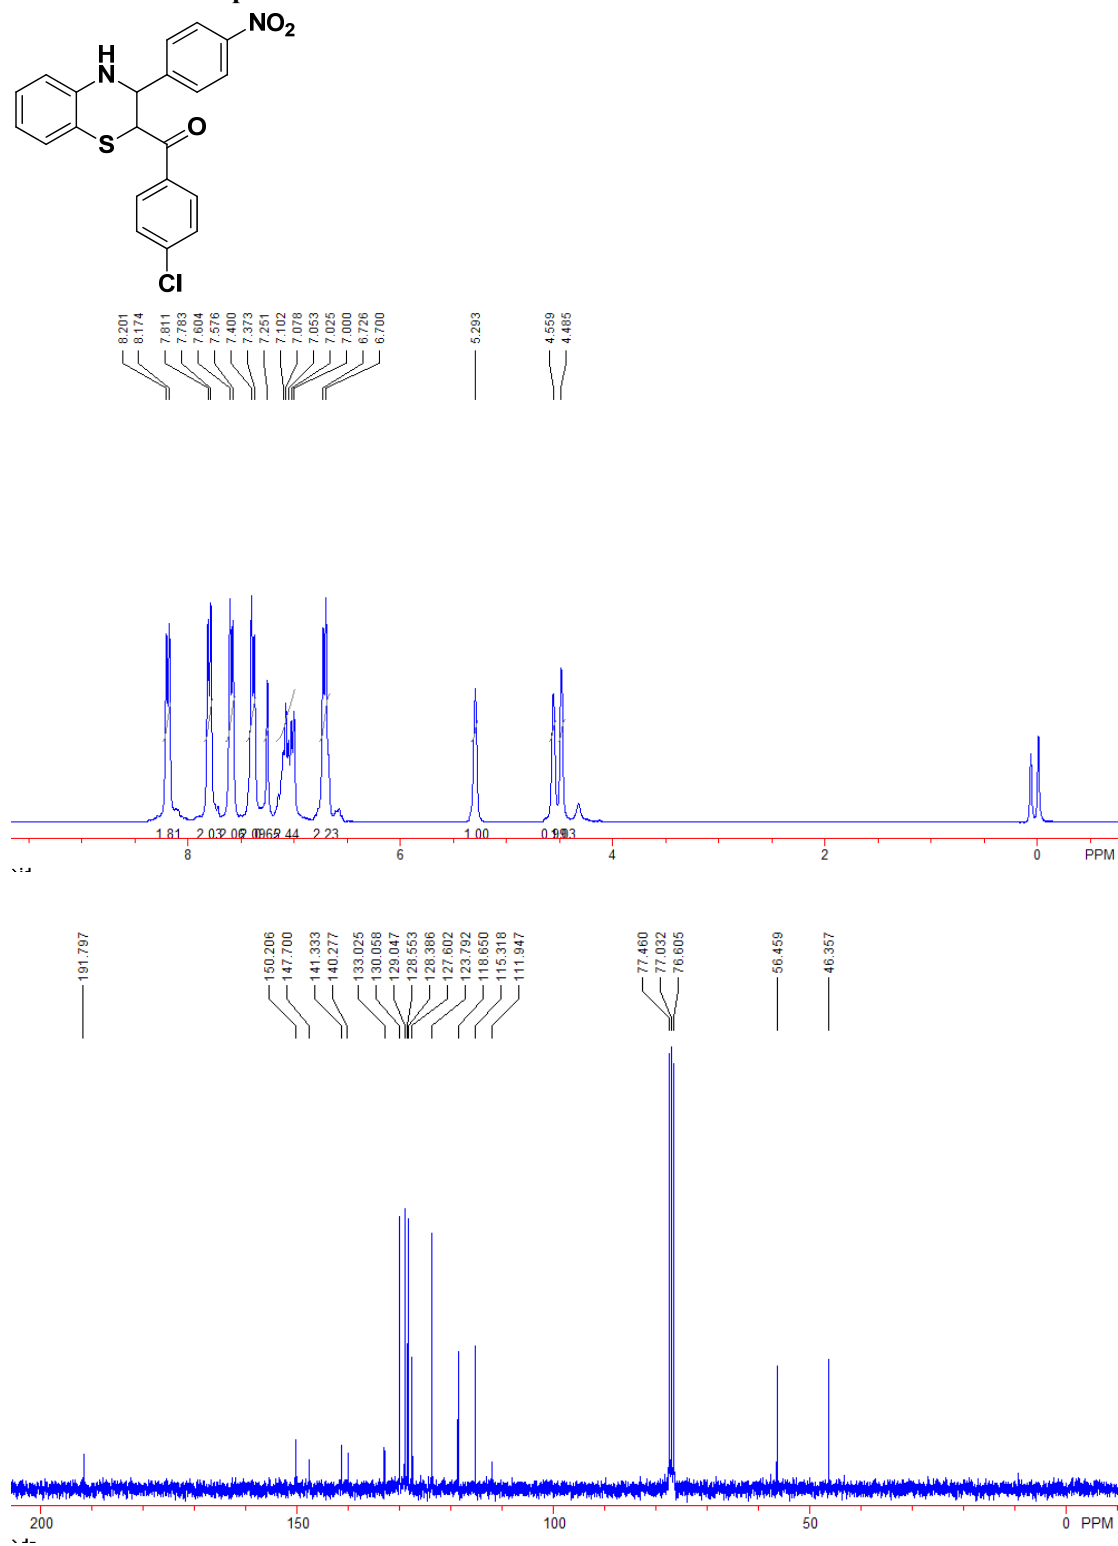



### <sup>1</sup>H and <sup>13</sup>C NMR spectra of 4ee

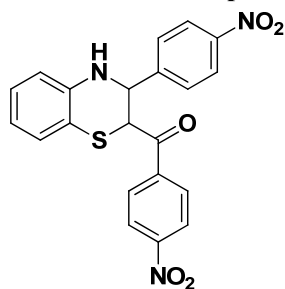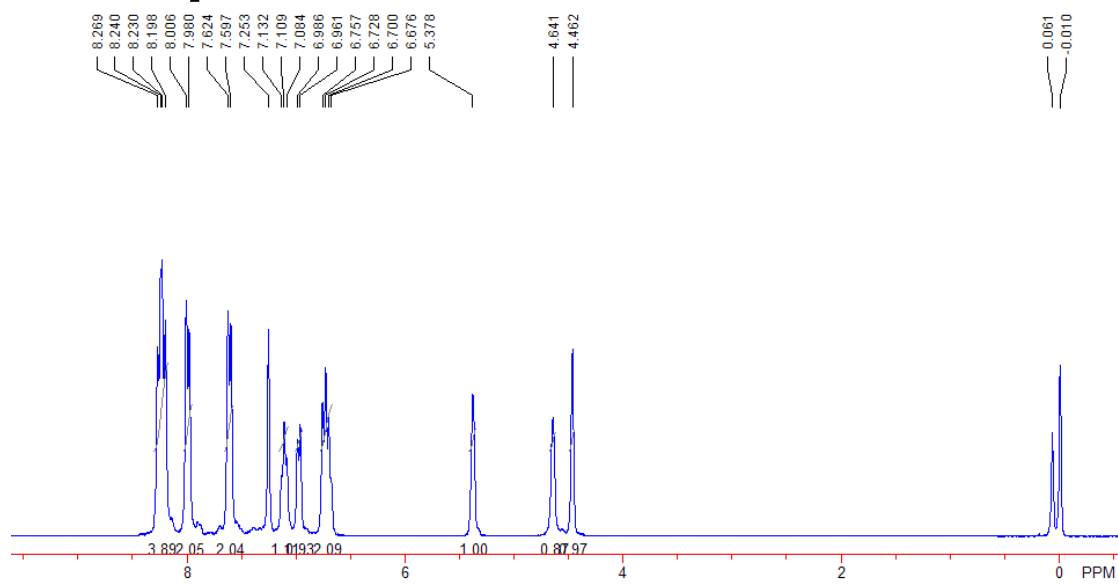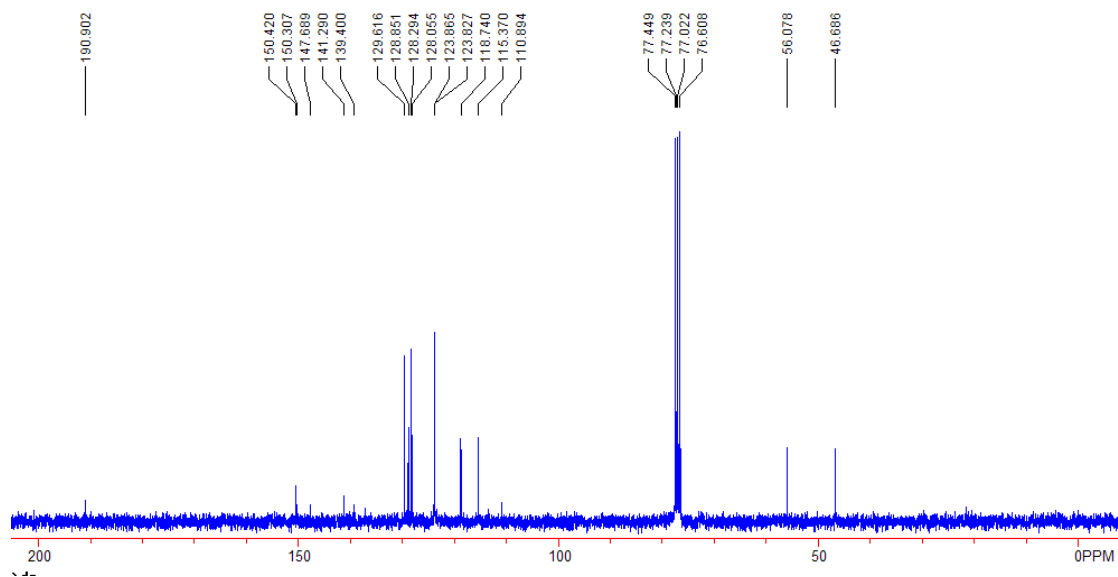

### <sup>1</sup>H and <sup>13</sup>C NMR spectra of 4fa

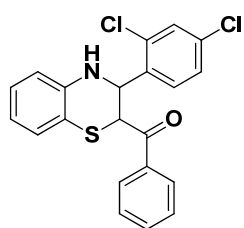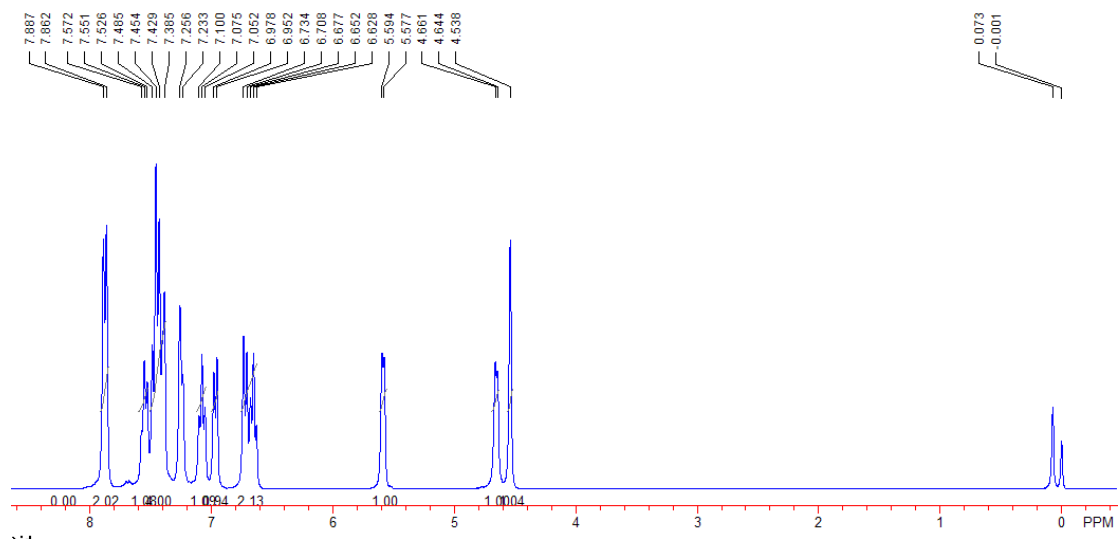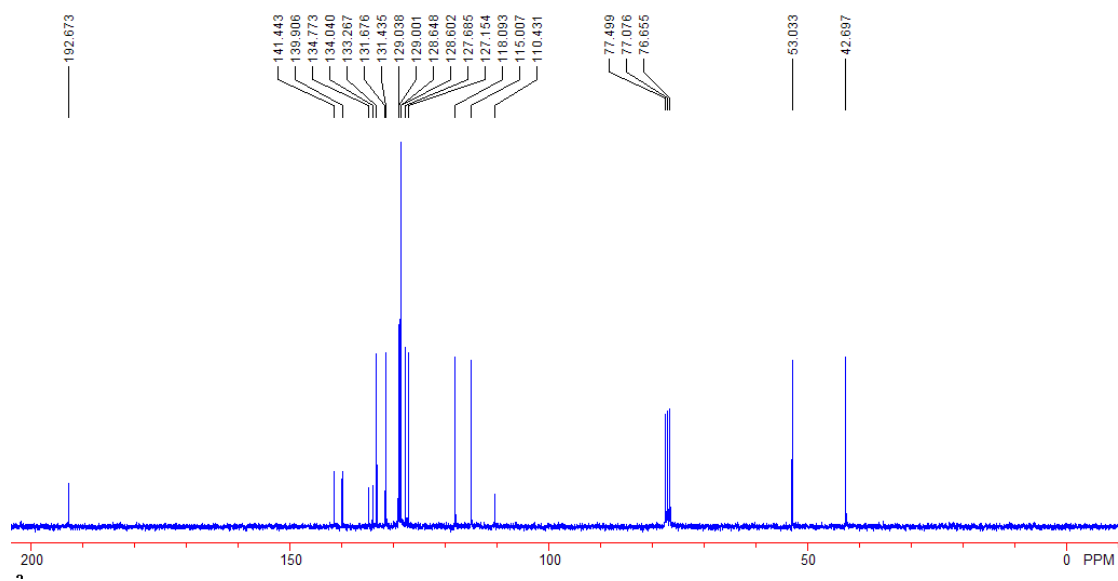

### $^1\text{H}$ and $^{13}\text{C}$ NMR spectra of 4fb

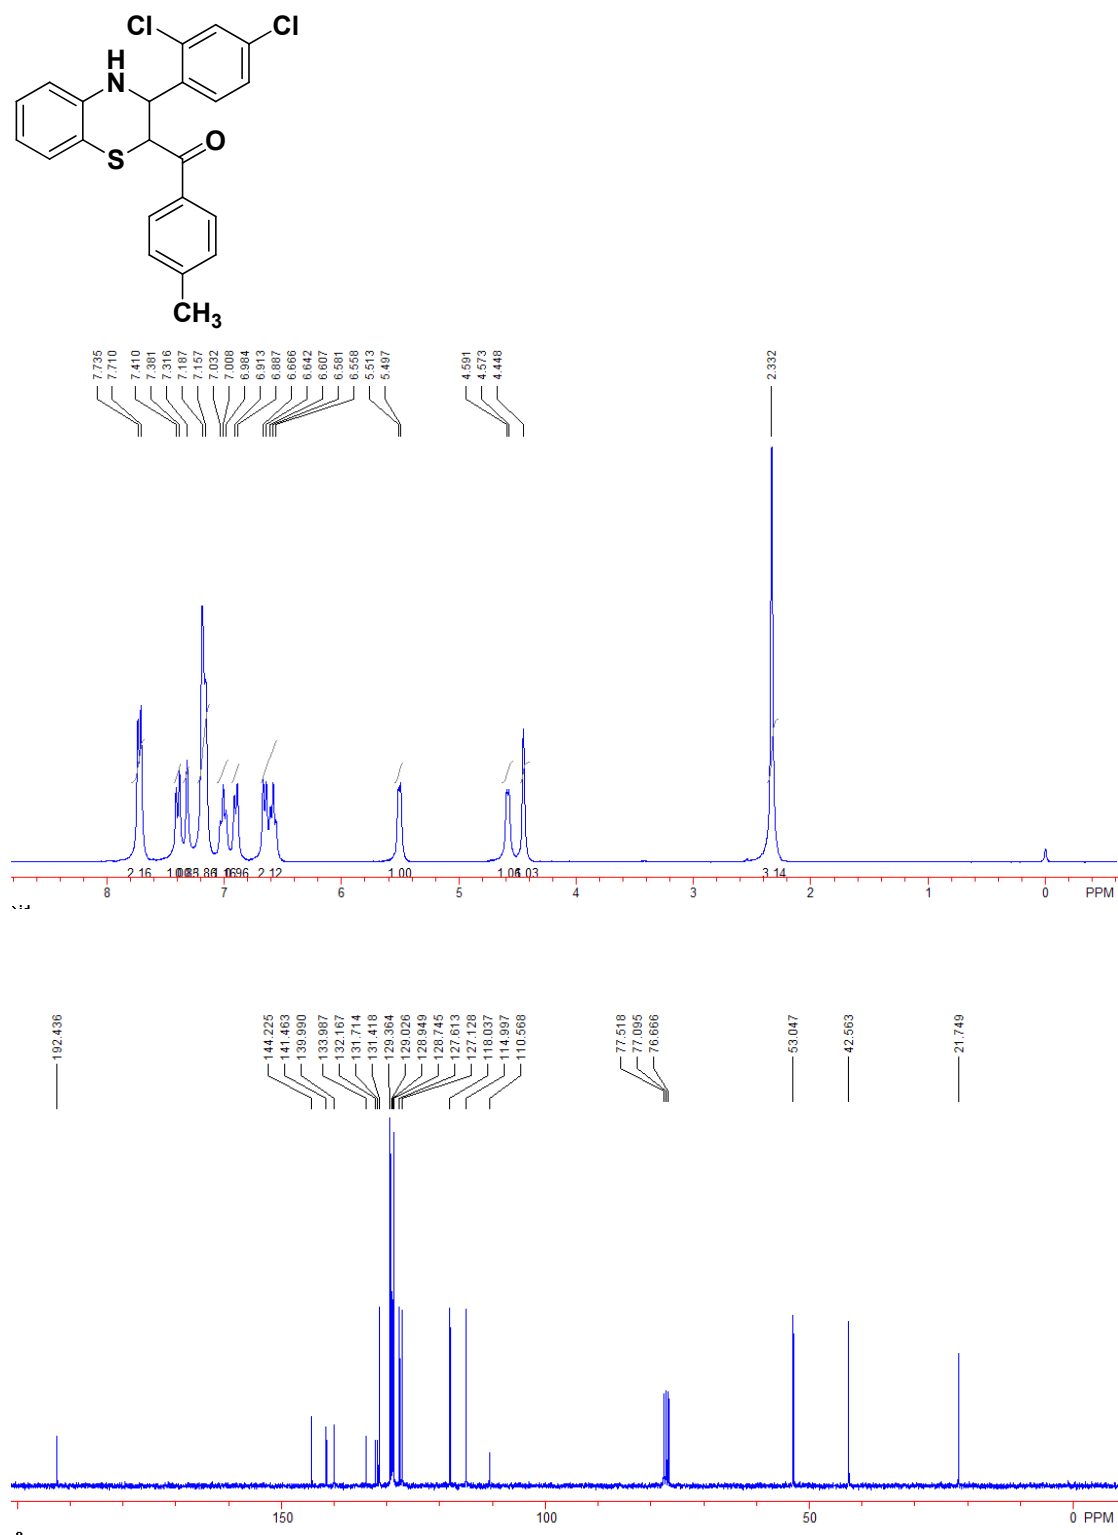

### $^1\text{H}$ and $^{13}\text{C}$ NMR spectra of 4fc

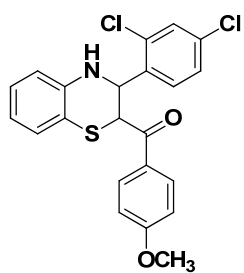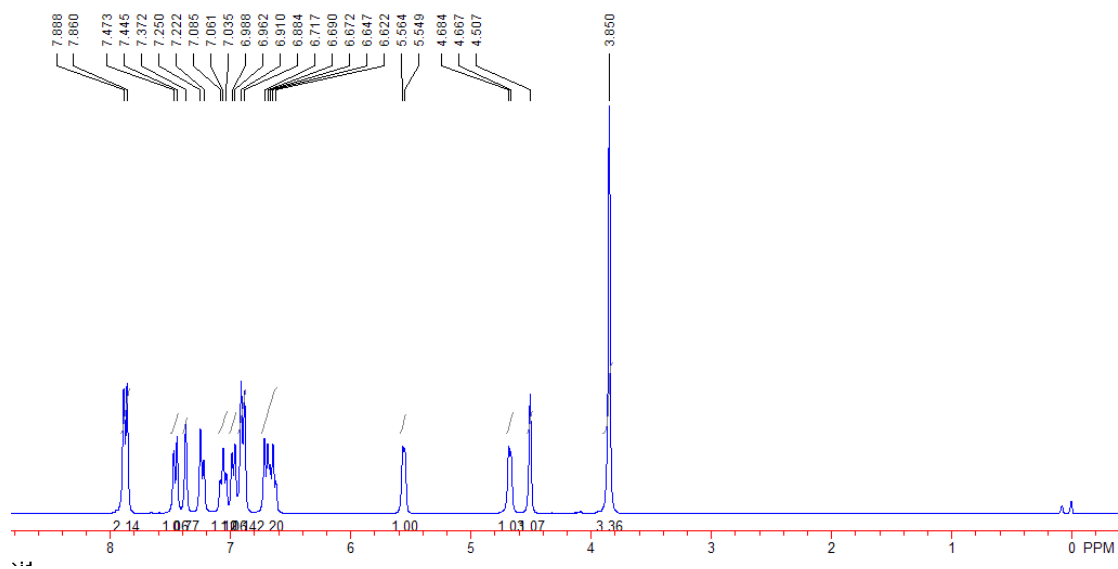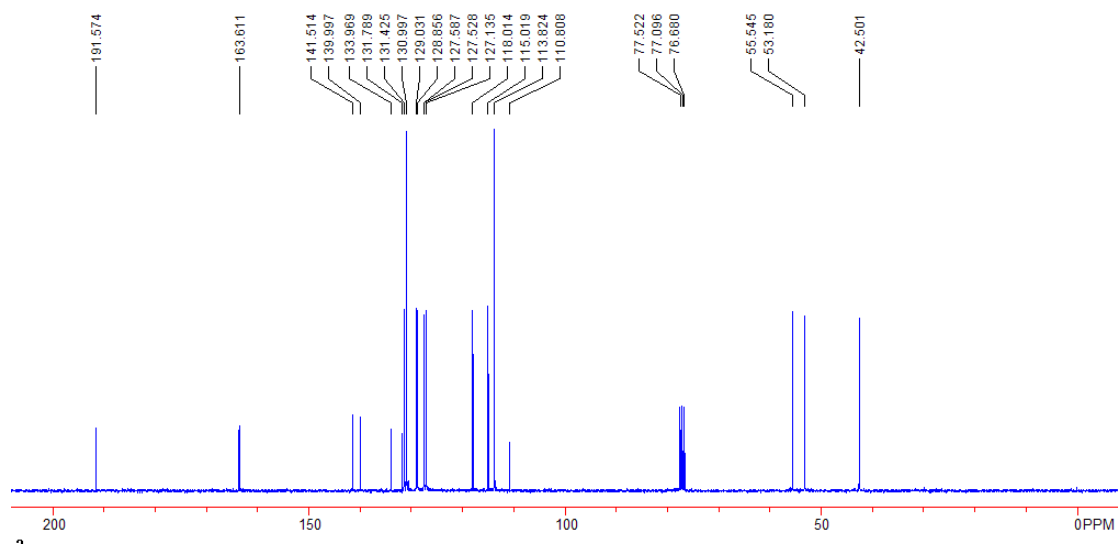

### $^1\text{H}$ and $^{13}\text{C}$ NMR spectra of 4fe

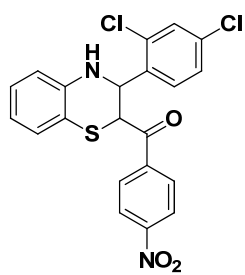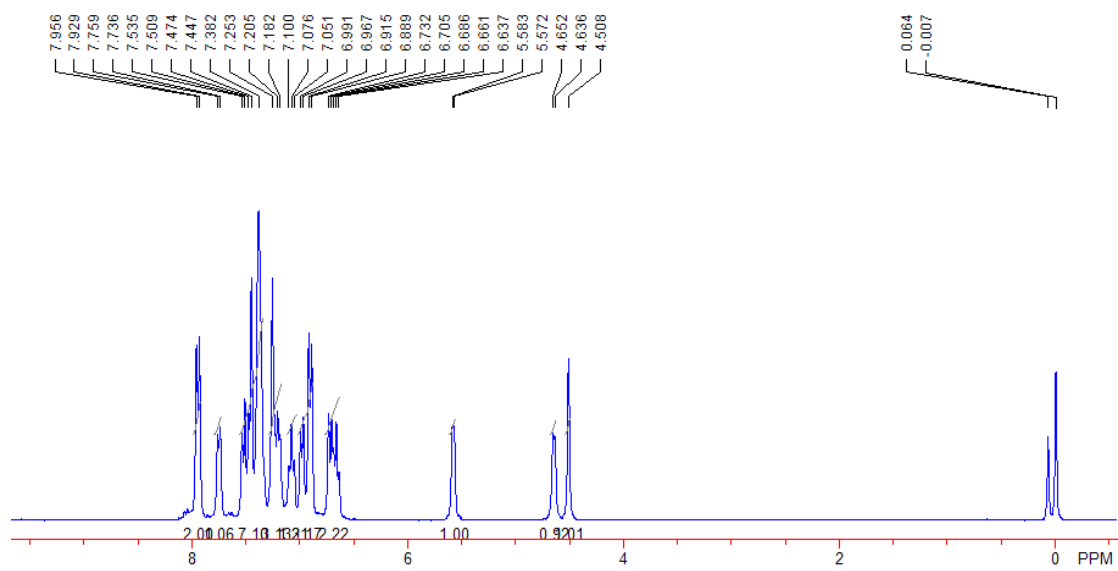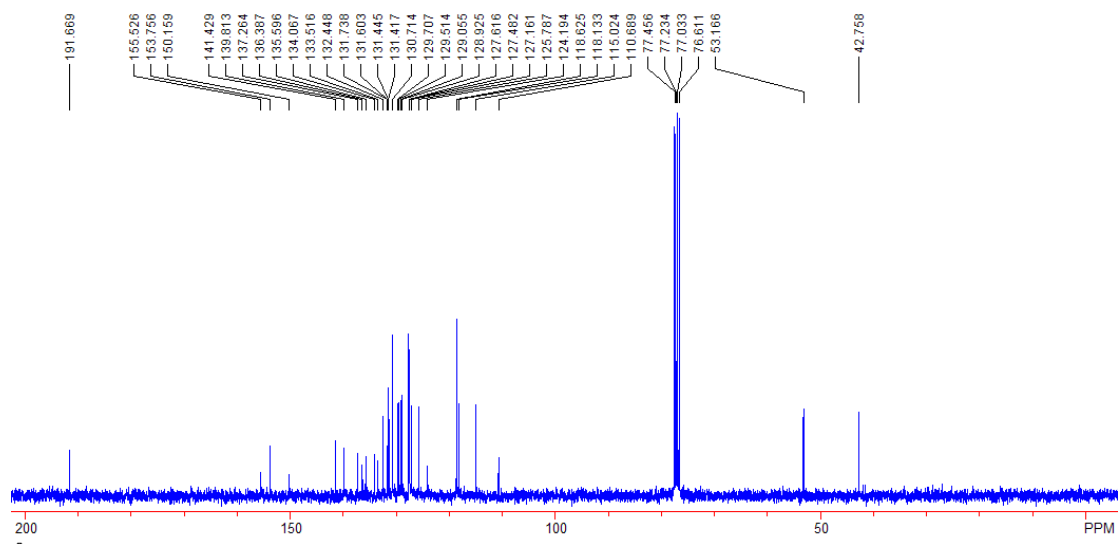

### <sup>1</sup>H and <sup>13</sup>C NMR spectra of 4ga

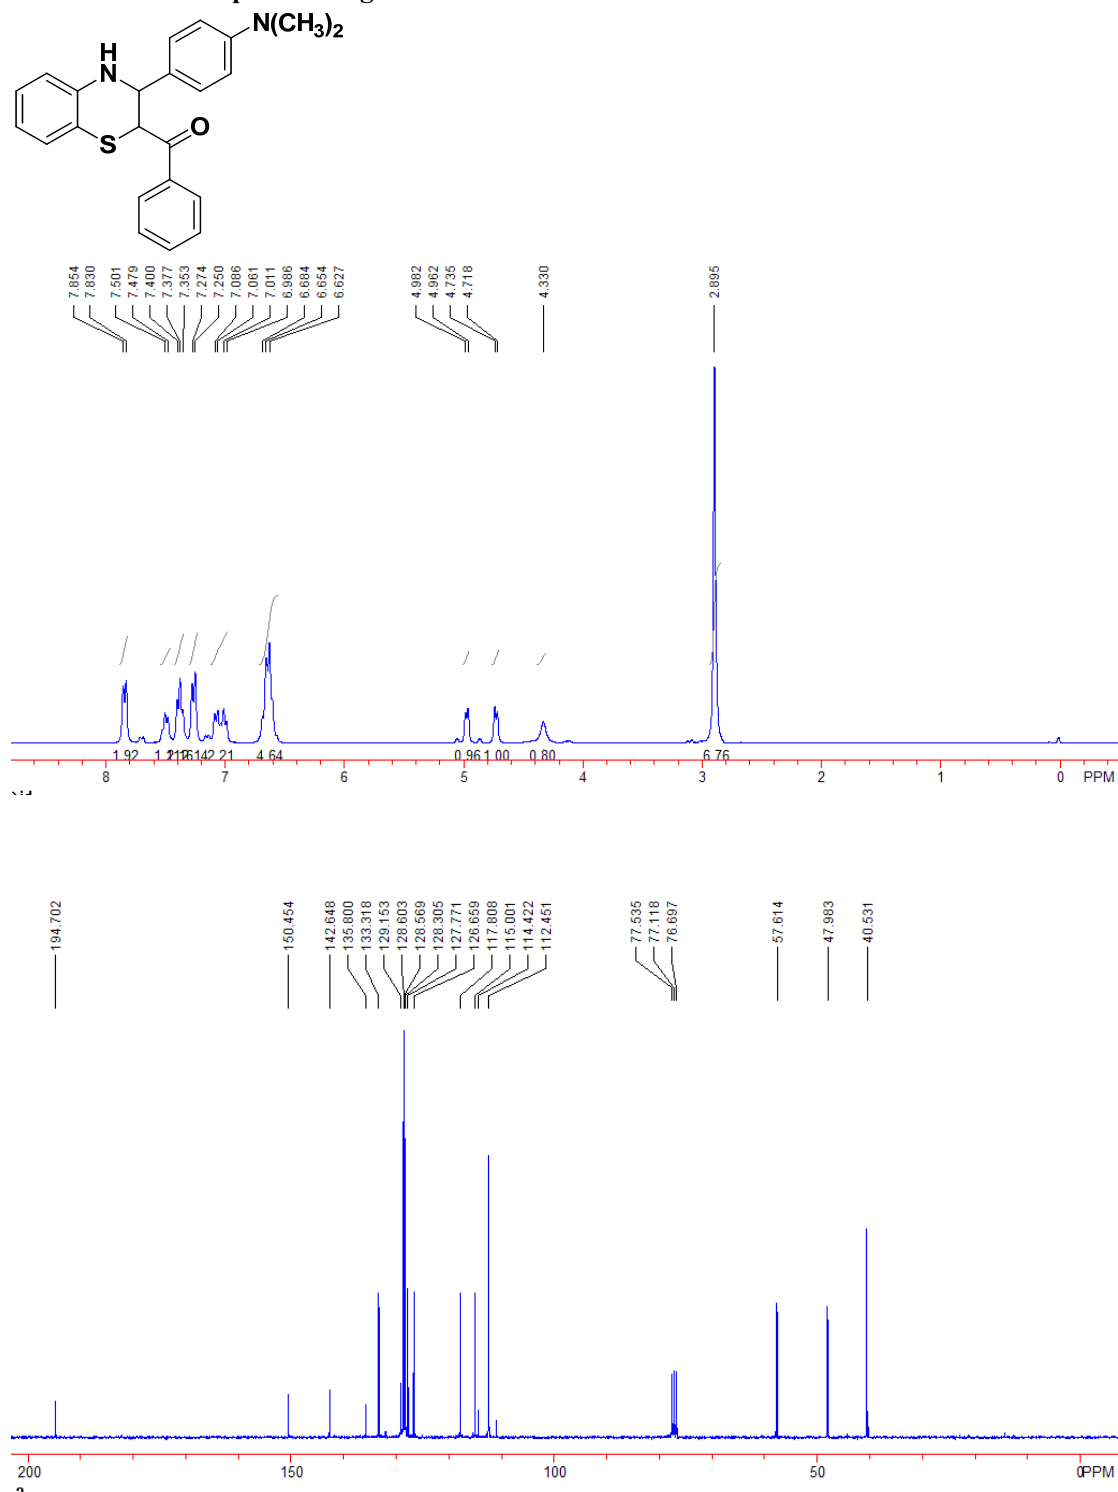

### <sup>1</sup>H and <sup>13</sup>C NMR spectra of 4gb

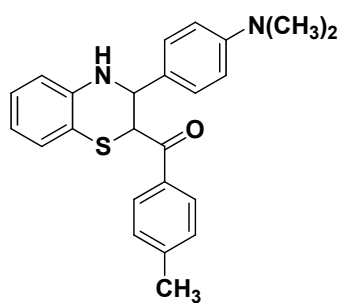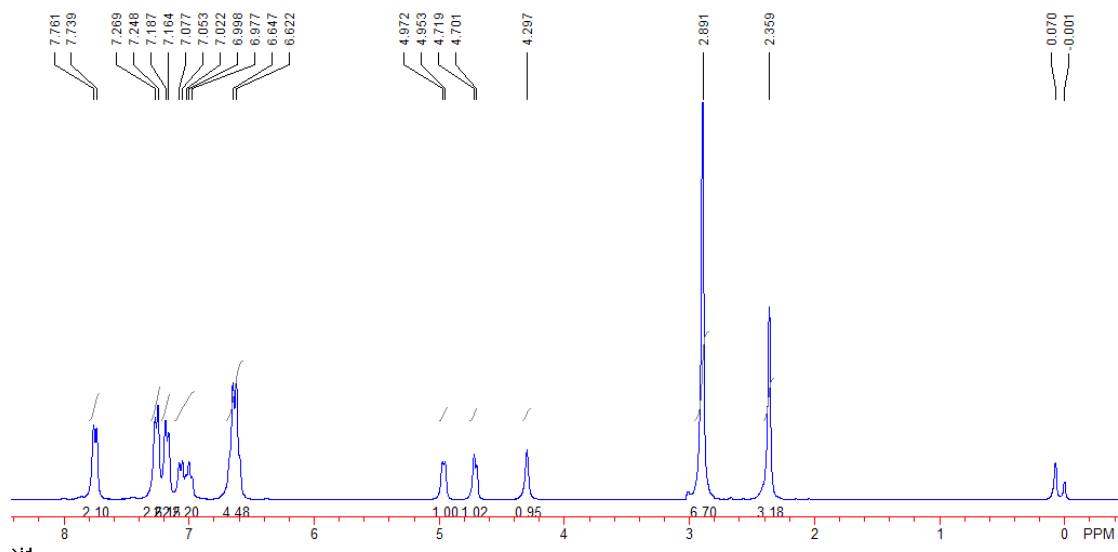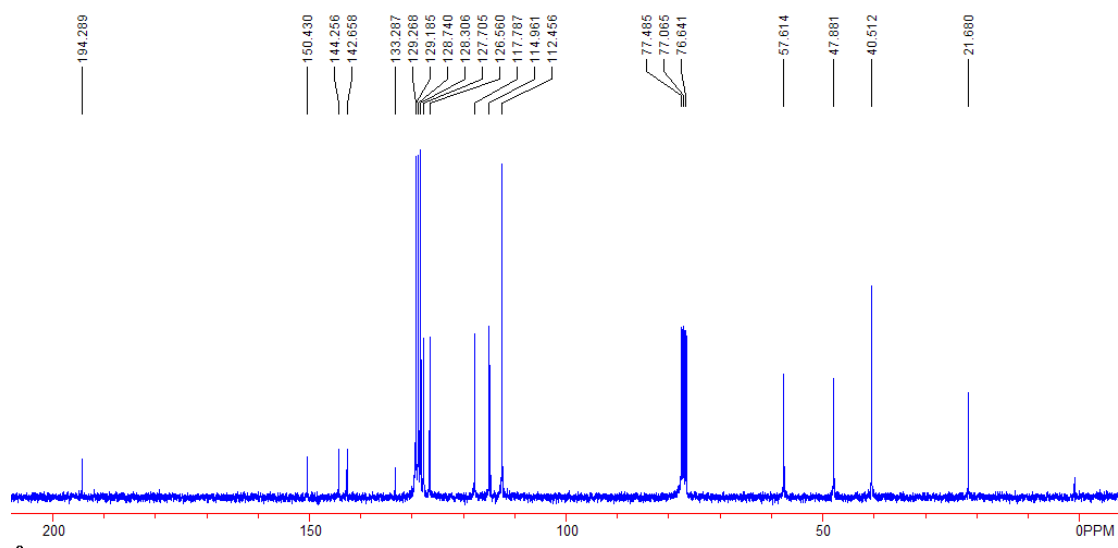

### <sup>1</sup>H and <sup>13</sup>C NMR spectra of 4gc

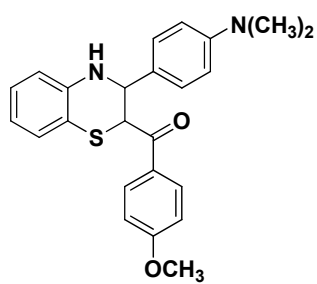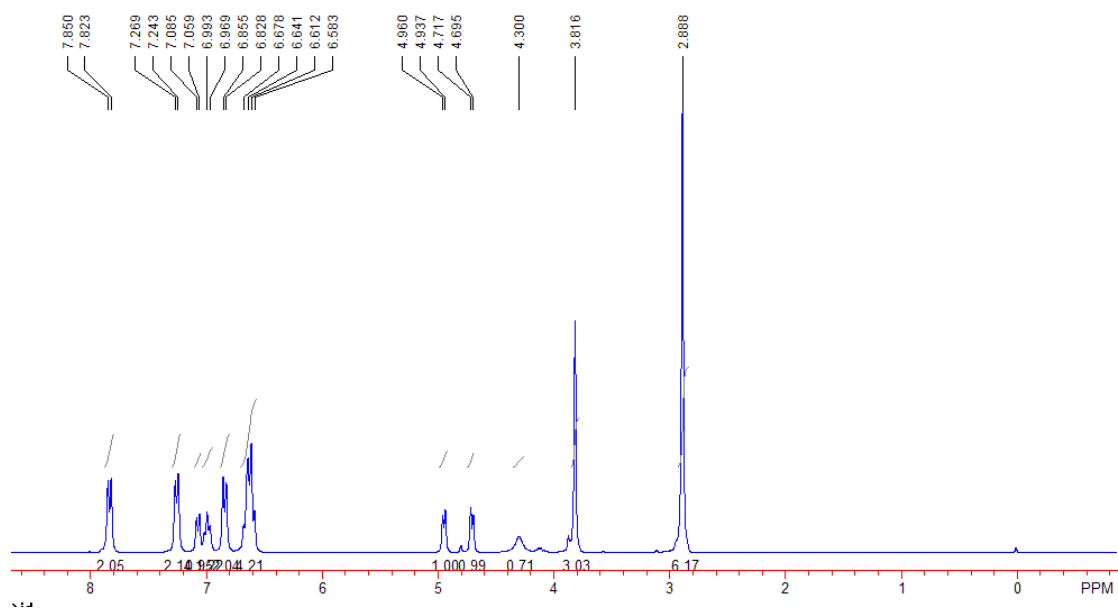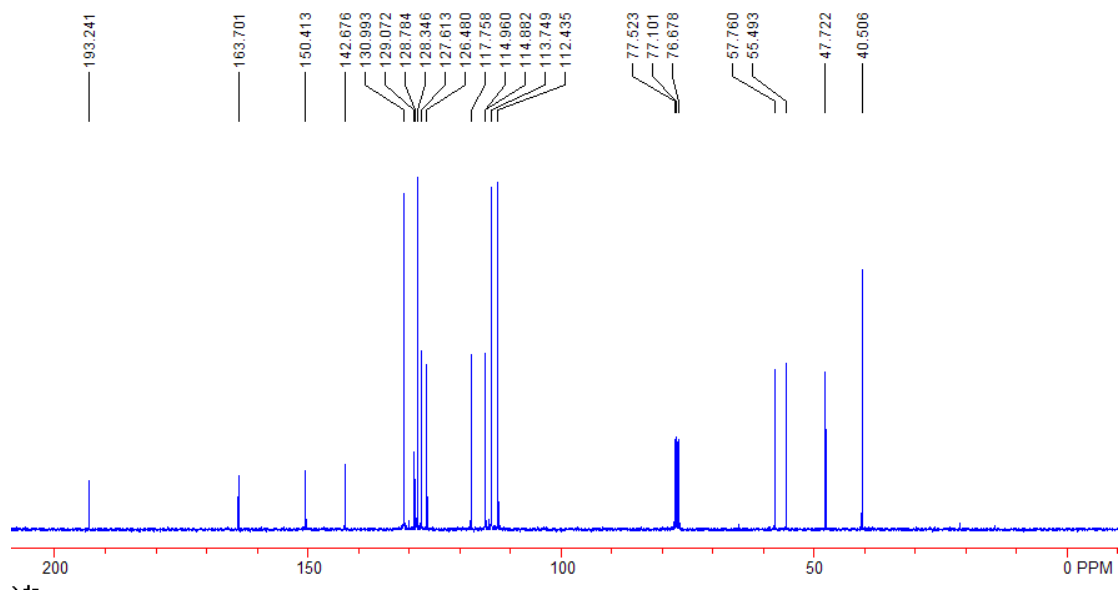



### $^1\text{H}$ and $^{13}\text{C}$ NMR spectra of 4gd

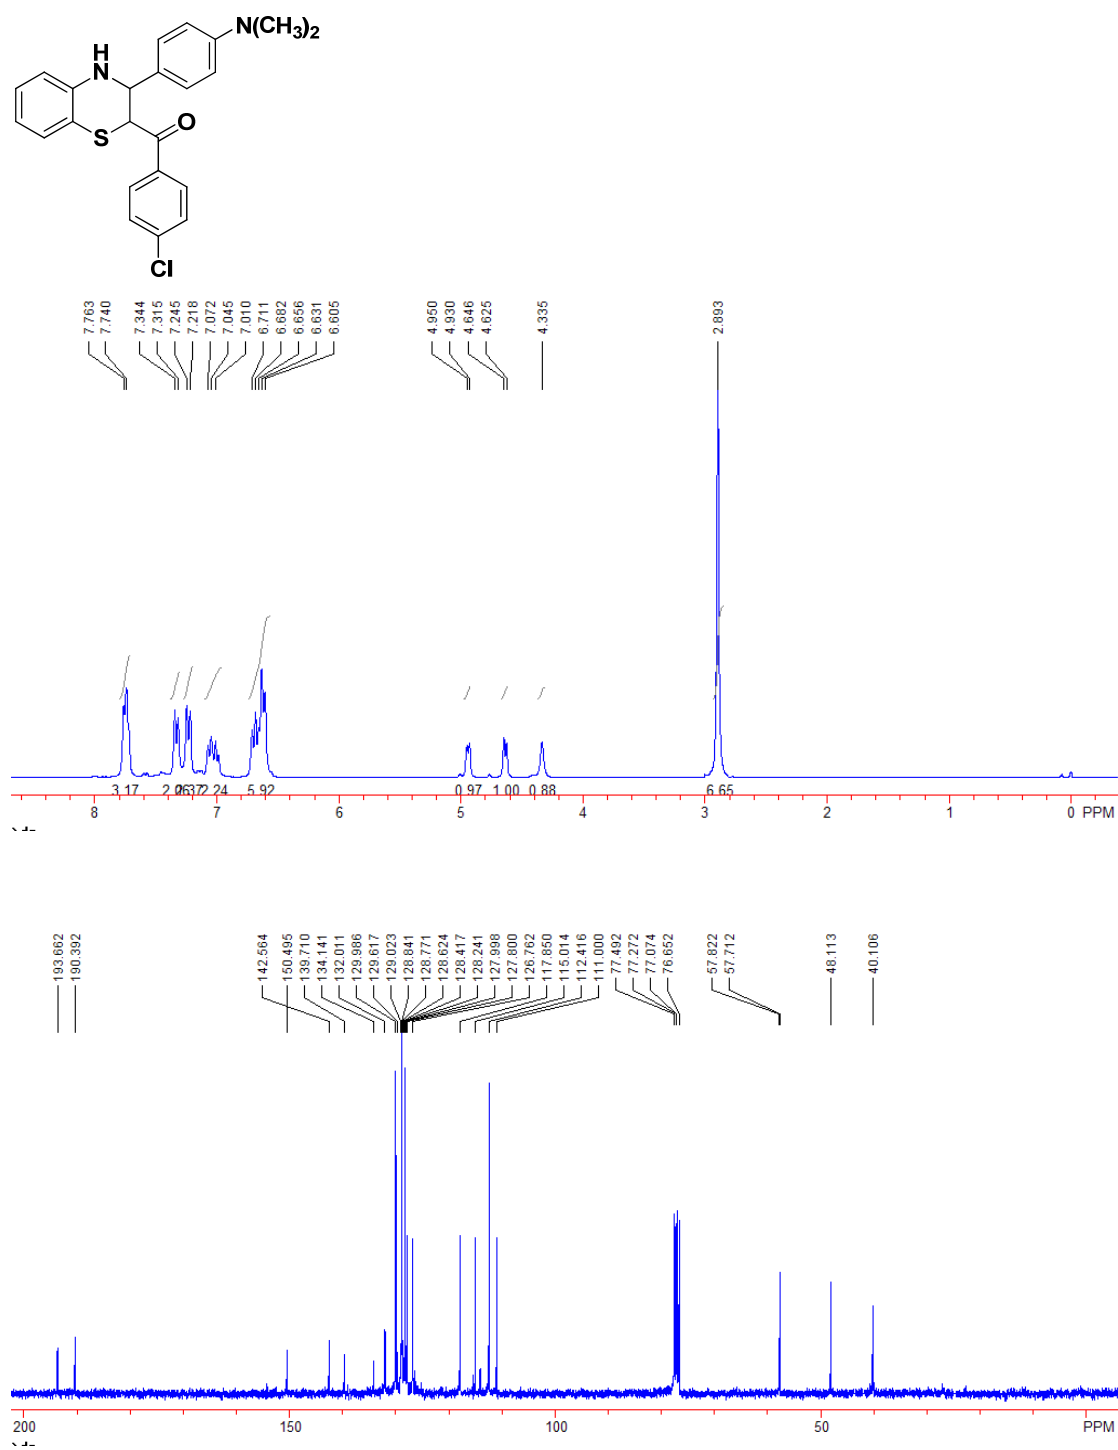

### <sup>1</sup>H and <sup>13</sup>C NMR spectra of 4hb

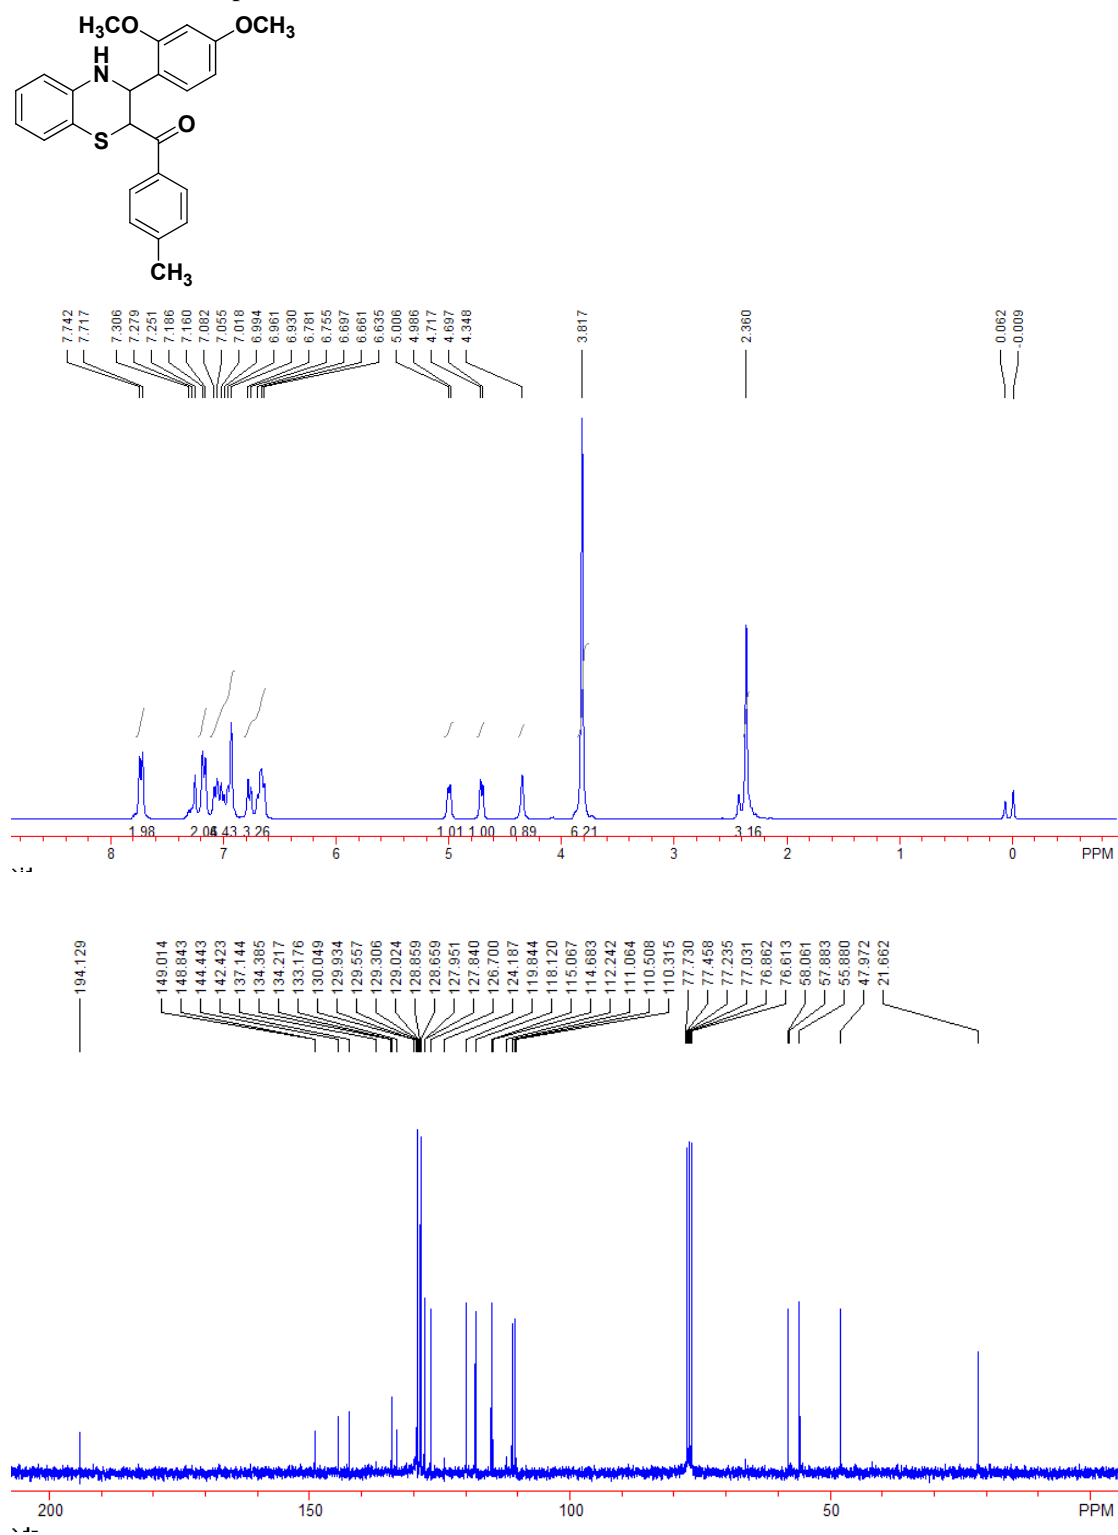

### $^1\text{H}$ and $^{13}\text{C}$ NMR spectra of 4cf

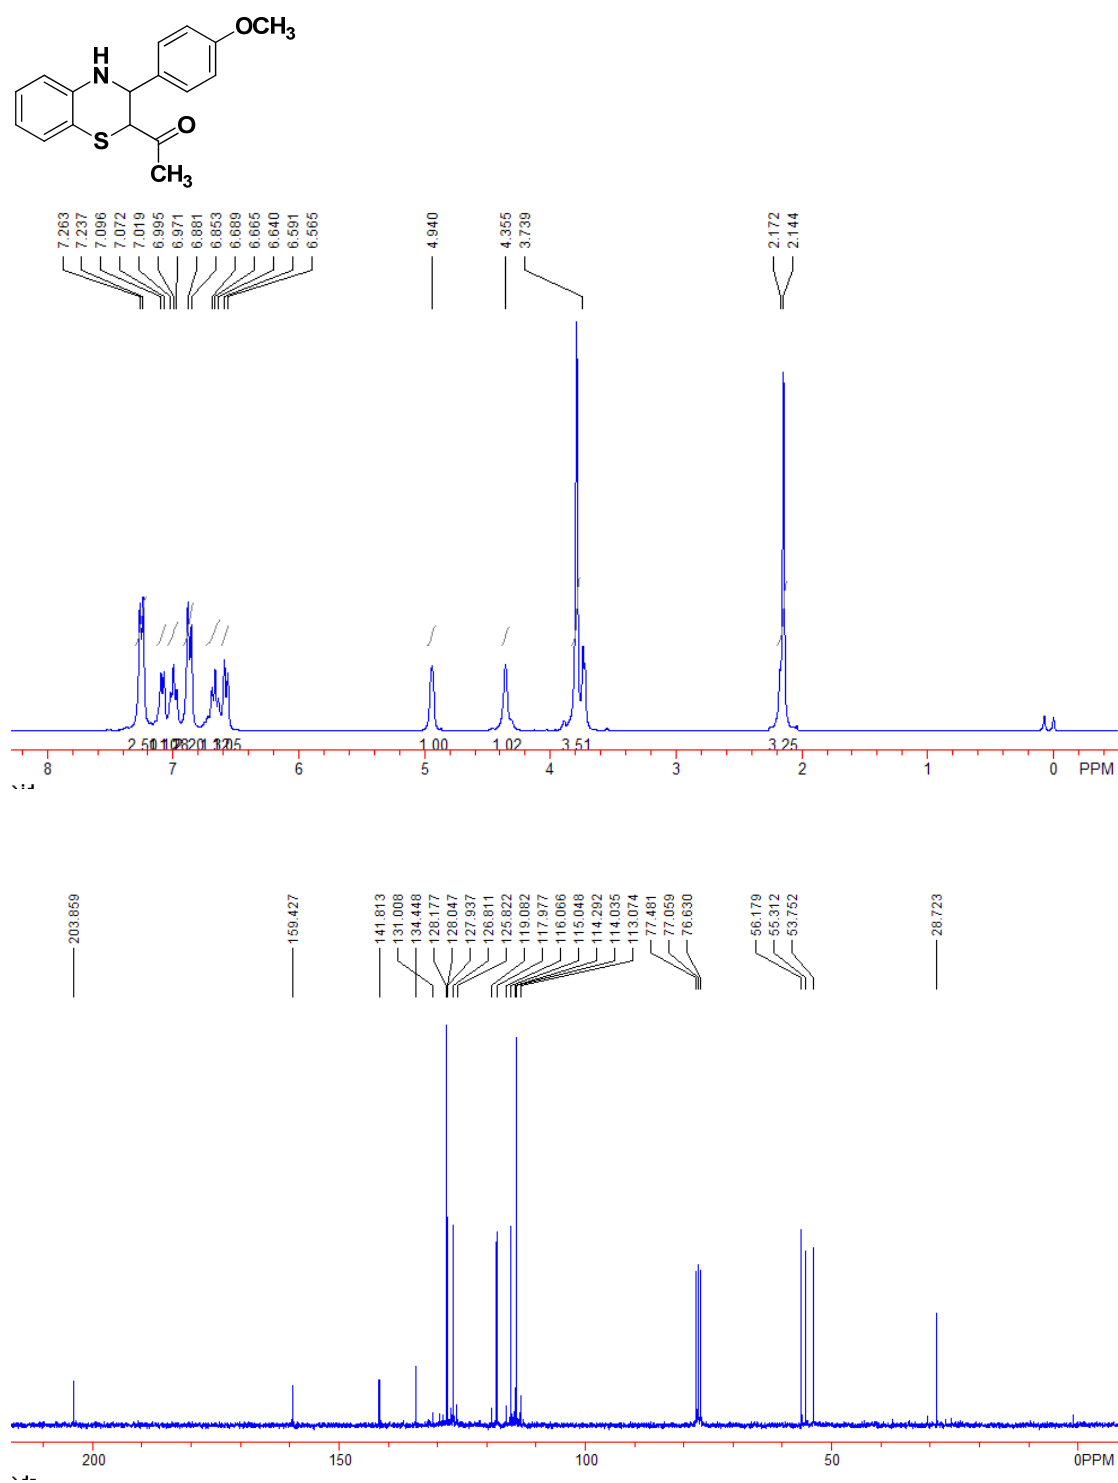

## X-ray Crystallography

The diffraction data for **4fb** were collected on a Bruker SMART APEX diffractometer using Mo K  $\alpha$  ( $\lambda = 0.71073 \text{ \AA}$ ). The crystallographic data are listed in Table S1. The CIF deposition number: **CCDC-847691**.

**Table S1.** Crystal data and structure refinement for **4fb**.

|                                   |                                                                                                                                                  |
|-----------------------------------|--------------------------------------------------------------------------------------------------------------------------------------------------|
| Identification code               | 101130b_0m                                                                                                                                       |
| Empirical formula                 | C <sub>22</sub> H <sub>17</sub> Cl <sub>2</sub> N O S                                                                                            |
| Formula weight                    | 414.33                                                                                                                                           |
| Temperature                       | 293(2) K                                                                                                                                         |
| Wavelength                        | 0.71073 Å                                                                                                                                        |
| Crystal system, space group       | Triclinic, P-1                                                                                                                                   |
| Unit cell dimensions              | a = 10.1879(10) Å    alpha = 95.3630(10) deg.<br>b = 10.7179(10) Å    beta = 109.8910(10) deg.<br>c = 11.0530(11) Å    gamma = 115.9520(10) deg. |
| Volume                            | 977.64(16) Å <sup>3</sup>                                                                                                                        |
| Z, Calculated density             | 2, 1.407 Mg/m <sup>3</sup>                                                                                                                       |
| Absorption coefficient            | 0.451 mm <sup>-1</sup>                                                                                                                           |
| F (000)                           | 428                                                                                                                                              |
| Crystal size                      | 0.14 x 0.12 x 0.11 mm                                                                                                                            |
| Theta range for data collection   | 2.05 to 26.00 deg.                                                                                                                               |
| Limiting indices                  | -12 ≤ h ≤ 12, -12 ≤ k ≤ 13, -13 ≤ l ≤ 13.                                                                                                        |
| Reflections collected / unique    | 7592 / 3797 [R(int) = 0.0186]                                                                                                                    |
| Completeness to theta = 26.00     | 98.9 %                                                                                                                                           |
| Absorption correction             | None                                                                                                                                             |
| Max. and min. transmission        | 0.9521 and 0.9396                                                                                                                                |
| Refinement method                 | Full-matrix least-squares on F <sup>2</sup>                                                                                                      |
| Data / restraints / parameters    | 3797 / 0 / 246                                                                                                                                   |
| Goodness-of-fit on F <sup>2</sup> | 1.043                                                                                                                                            |
| Final R indices [I > 2 sigma (I)] | R1 = 0.0380, wR2 = 0.1012                                                                                                                        |
| R indices (all data)              | R1 = 0.0446, wR2 = 0.1077                                                                                                                        |
| Largest diff. peak and hole       | 0.263 and -0.302 e.Å <sup>-3</sup>                                                                                                               |

**Table S2.** Selected Bond lengths [Å] and angles [°] for **4fb**.

---

|              |            |
|--------------|------------|
| Cl(1)-C(18)  | 1.7451(19) |
| Cl(2)-C(20)  | 1.742(2)   |
| S(1)-C(6)    | 1.7581(19) |
| S(1)-C(7)    | 1.8184(19) |
| O(1)-C(8)    | 1.219(2)   |
| N(1)-C(1)    | 1.374(2)   |
| N(1)-C(16)   | 1.449(2)   |
| N(1)-H(1)    | 0.8600     |
| C(1)-C(6)    | 1.397(3)   |
| C(1)-C(2)    | 1.402(3)   |
| C(2)-C(3)    | 1.372(3)   |
| C(2)-H(2)    | 0.9300     |
| C(3)-C(4)    | 1.378(4)   |
| C(3)-H(3)    | 0.9300     |
| C(4)-C(5)    | 1.373(3)   |
| C(4)-H(4)    | 0.9300     |
| C(5)-C(6)    | 1.388(3)   |
| C(5)-H(5)    | 0.9300     |
| C(7)-C(8)    | 1.517(3)   |
| C(7)-C(16)   | 1.540(2)   |
| C(7)-H(7)    | 0.9800     |
| C(8)-C(9)    | 1.482(3)   |
| C(9)-C(10)   | 1.390(3)   |
| C(9)-C(14)   | 1.391(3)   |
| C(10)-C(11)  | 1.378(3)   |
| C(10)-H(10)  | 0.9300     |
| C(11)-C(12)  | 1.387(3)   |
| C(11)-H(11)  | 0.9300     |
| C(12)-C(13)  | 1.378(3)   |
| C(12)-C(15)  | 1.508(3)   |
| C(13)-C(14)  | 1.377(3)   |
| C(13)-H(13)  | 0.9300     |
| C(14)-H(14)  | 0.9300     |
| C(15)-H(15A) | 0.9600     |
| C(15)-H(15B) | 0.9600     |
| C(15)-H(15C) | 0.9600     |
| C(16)-C(17)  | 1.516(3)   |
| C(16)-H(16)  | 0.9800     |
| C(17)-C(18)  | 1.385(3)   |
| C(17)-C(22)  | 1.392(3)   |
| C(18)-C(19)  | 1.383(3)   |
| C(19)-C(20)  | 1.372(3)   |

|                   |            |
|-------------------|------------|
| C(19)-H(19)       | 0.9300     |
| C(20)-C(21)       | 1.370(3)   |
| C(21)-C(22)       | 1.375(3)   |
| C(21)-H(21)       | 0.9300     |
| C(22)-H(22)       | 0.9300     |
|                   |            |
| C(6)-S(1)-C(7)    | 98.55(8)   |
| C(1)-N(1)-C(16)   | 127.18(16) |
| C(1)-N(1)-H(1)    | 116.4      |
| C(16)-N(1)-H(1)   | 116.4      |
| N(1)-C(1)-C(6)    | 122.93(17) |
| N(1)-C(1)-C(2)    | 119.26(18) |
| C(6)-C(1)-C(2)    | 117.79(18) |
| C(3)-C(2)-C(1)    | 120.9(2)   |
| C(3)-C(2)-H(2)    | 119.6      |
| C(1)-C(2)-H(2)    | 119.6      |
| C(2)-C(3)-C(4)    | 120.8(2)   |
| C(2)-C(3)-H(3)    | 119.6      |
| C(4)-C(3)-H(3)    | 119.6      |
| C(5)-C(4)-C(3)    | 119.3(2)   |
| C(5)-C(4)-H(4)    | 120.3      |
| C(3)-C(4)-H(4)    | 120.3      |
| C(4)-C(5)-C(6)    | 120.7(2)   |
| C(4)-C(5)-H(5)    | 119.6      |
| C(6)-C(5)-H(5)    | 119.6      |
| C(5)-C(6)-C(1)    | 120.42(19) |
| C(5)-C(6)-S(1)    | 119.26(16) |
| C(1)-C(6)-S(1)    | 120.23(14) |
| C(8)-C(7)-C(16)   | 112.48(14) |
| C(8)-C(7)-S(1)    | 109.74(12) |
| C(16)-C(7)-S(1)   | 111.74(13) |
| C(8)-C(7)-H(7)    | 107.5      |
| C(16)-C(7)-H(7)   | 107.5      |
| S(1)-C(7)-H(7)    | 107.5      |
| O(1)-C(8)-C(9)    | 120.74(18) |
| O(1)-C(8)-C(7)    | 119.43(17) |
| C(9)-C(8)-C(7)    | 119.84(15) |
| C(10)-C(9)-C(14)  | 117.88(18) |
| C(10)-C(9)-C(8)   | 118.25(17) |
| C(14)-C(9)-C(8)   | 123.86(17) |
| C(11)-C(10)-C(9)  | 121.38(19) |
| C(11)-C(10)-H(10) | 119.3      |
| C(9)-C(10)-H(10)  | 119.3      |
| C(10)-C(11)-C(12) | 120.6(2)   |

|                     |            |
|---------------------|------------|
| C(10)-C(11)-H(11)   | 119.7      |
| C(12)-C(11)-H(11)   | 119.7      |
| C(13)-C(12)-C(11)   | 117.90(19) |
| C(13)-C(12)-C(15)   | 121.4(2)   |
| C(11)-C(12)-C(15)   | 120.7(2)   |
| C(14)-C(13)-C(12)   | 122.08(19) |
| C(14)-C(13)-H(13)   | 119.0      |
| C(12)-C(13)-H(13)   | 119.0      |
| C(13)-C(14)-C(9)    | 120.16(19) |
| C(13)-C(14)-H(14)   | 119.9      |
| C(9)-C(14)-H(14)    | 119.9      |
| C(12)-C(15)-H(15A)  | 109.5      |
| C(12)-C(15)-H(15B)  | 109.5      |
| H(15A)-C(15)-H(15B) | 109.5      |
| C(12)-C(15)-H(15C)  | 109.5      |
| H(15A)-C(15)-H(15C) | 109.5      |
| H(15B)-C(15)-H(15C) | 109.5      |
| N(1)-C(16)-C(17)    | 111.80(15) |
| N(1)-C(16)-C(7)     | 113.96(15) |
| C(17)-C(16)-C(7)    | 110.51(14) |
| N(1)-C(16)-H(16)    | 106.7      |
| C(17)-C(16)-H(16)   | 106.7      |
| C(7)-C(16)-H(16)    | 106.7      |
| C(18)-C(17)-C(22)   | 116.41(17) |
| C(18)-C(17)-C(16)   | 121.91(16) |
| C(22)-C(17)-C(16)   | 121.67(16) |
| C(19)-C(18)-C(17)   | 122.62(18) |
| C(19)-C(18)-Cl(1)   | 117.09(15) |
| C(17)-C(18)-Cl(1)   | 120.24(15) |
| C(20)-C(19)-C(18)   | 118.47(19) |
| C(20)-C(19)-H(19)   | 120.8      |
| C(18)-C(19)-H(19)   | 120.8      |
| C(21)-C(20)-C(19)   | 121.10(19) |
| C(21)-C(20)-Cl(2)   | 118.89(17) |
| C(19)-C(20)-Cl(2)   | 119.98(17) |
| C(20)-C(21)-C(22)   | 119.28(19) |
| C(20)-C(21)-H(21)   | 120.4      |
| C(22)-C(21)-H(21)   | 120.4      |
| C(21)-C(22)-C(17)   | 122.04(18) |
| C(21)-C(22)-H(22)   | 119.0      |
| C(17)-C(22)-H(22)   | 119.0      |

---

The diffraction data for **4ec** were collected on a Bruker SMART APEX diffractometer using Mo K  $\alpha$  ( $\lambda = 0.71073 \text{ \AA}$ ). The crystallographic data are listed in Table S1. The CIF deposition number: **CCDC-847690**.

**Table S1.** Crystal data and structure refinement for **4ec**.

|                                   |                                                                                                               |
|-----------------------------------|---------------------------------------------------------------------------------------------------------------|
| Identification code               | 101130a_0m                                                                                                    |
| Empirical formula                 | C <sub>22</sub> H <sub>18</sub> N <sub>2</sub> O <sub>4</sub> S                                               |
| Formula weight                    | 406.44                                                                                                        |
| Temperature                       | 293(2) K                                                                                                      |
| Wavelength                        | 0.71073 Å                                                                                                     |
| Crystal system, space group       | Triclinic, Pbc <sub>a</sub>                                                                                   |
| Unit cell dimensions              | a = 10.427(2) Å    alpha = 90 deg.<br>b = 19.086(4) Å    beta = 90 deg.<br>c = 19.748(4) Å    gamma = 90 deg. |
| Volume                            | 3929.9(14) Å <sup>3</sup>                                                                                     |
| Z, Calculated density             | 8, 1.374 Mg/m <sup>3</sup>                                                                                    |
| Absorption coefficient            | 0.197 mm <sup>-1</sup>                                                                                        |
| F (000)                           | 1696                                                                                                          |
| Crystal size                      | 0.14 x 0.12 x 0.11 mm                                                                                         |
| Theta range for data collection   | 2.06 to 27.53 deg.                                                                                            |
| Limiting indices                  | -13 ≤ h ≤ 13, -24 ≤ k ≤ 24, -22 ≤ l ≤ 25                                                                      |
| Reflections collected / unique    | 32048 / 4512 [R(int) = 0.0286]                                                                                |
| Completeness to theta = 26.00     | 99.6 %                                                                                                        |
| Absorption correction             | None                                                                                                          |
| Max. and min. transmission        | 0.9787 and 0.9730                                                                                             |
| Refinement method                 | Full-matrix least-squares on F <sup>2</sup>                                                                   |
| Data / restraints / parameters    | 4512 / 0 / 263                                                                                                |
| Goodness-of-fit on F <sup>2</sup> | 1.024                                                                                                         |
| Final R indices [I > 2 sigma (I)] | R1 = 0.0407, wR2 = 0.1047                                                                                     |
| R indices (all data)              | R1 = 0.0549, wR2 = 0.1170                                                                                     |
| Largest diff. peak and hole       | 0.397 and -0.386 e.Å <sup>-3</sup>                                                                            |



**Table S2.** Selected Bond lengths [Å] and angles [°] for **4ec**.

---

|             |            |
|-------------|------------|
| S(1)-C(6)   | 1.7610(17) |
| S(1)-C(7)   | 1.8205(18) |
| O(1)-N(2)   | 1.212(2)   |
| O(2)-N(2)   | 1.220(2)   |
| O(3)-C(8)   | 1.209(2)   |
| O(4)-C(19)  | 1.366(2)   |
| O(4)-C(22)  | 1.424(3)   |
| N(1)-C(1)   | 1.383(2)   |
| N(1)-C(15)  | 1.451(2)   |
| N(1)-H(1)   | 0.8600     |
| N(2)-C(12)  | 1.469(2)   |
| C(1)-C(2)   | 1.394(2)   |
| C(1)-C(6)   | 1.397(2)   |
| C(2)-C(3)   | 1.379(3)   |
| C(2)-H(2)   | 0.9300     |
| C(3)-C(4)   | 1.382(3)   |
| C(3)-H(3)   | 0.9300     |
| C(4)-C(5)   | 1.371(3)   |
| C(4)-H(4)   | 0.9300     |
| C(5)-C(6)   | 1.393(2)   |
| C(5)-H(5)   | 0.9300     |
| C(7)-C(8)   | 1.520(2)   |
| C(7)-C(15)  | 1.535(2)   |
| C(7)-H(7)   | 0.9800     |
| C(8)-C(9)   | 1.494(2)   |
| C(9)-C(10)  | 1.387(2)   |
| C(9)-C(14)  | 1.389(2)   |
| C(10)-C(11) | 1.378(2)   |
| C(10)-H(10) | 0.9300     |
| C(11)-C(12) | 1.371(2)   |
| C(11)-H(11) | 0.9300     |
| C(12)-C(13) | 1.372(2)   |
| C(13)-C(14) | 1.378(2)   |
| C(13)-H(13) | 0.9300     |
| C(14)-H(14) | 0.9300     |
| C(15)-C(16) | 1.513(2)   |
| C(15)-H(15) | 0.9800     |
| C(16)-C(21) | 1.381(2)   |
| C(16)-C(17) | 1.389(2)   |
| C(17)-C(18) | 1.379(3)   |
| C(17)-H(17) | 0.9300     |

|                  |            |
|------------------|------------|
| C(18)-C(19)      | 1.376(3)   |
| C(18)-H(18)      | 0.9300     |
| C(19)-C(20)      | 1.383(2)   |
| C(20)-C(21)      | 1.379(3)   |
| C(20)-H(20)      | 0.9300     |
| C(21)-H(21)      | 0.9300     |
| C(22)-H(22A)     | 0.9600     |
| C(22)-H(22B)     | 0.9600     |
| C(22)-H(22C)     | 0.9600     |
|                  |            |
| C(6)-S(1)-C(7)   | 101.58(8)  |
| C(19)-O(4)-C(22) | 118.18(16) |
| C(1)-N(1)-C(15)  | 121.19(13) |
| C(1)-N(1)-H(1)   | 119.4      |
| C(15)-N(1)-H(1)  | 119.4      |
| O(1)-N(2)-O(2)   | 123.45(17) |
| O(1)-N(2)-C(12)  | 118.33(17) |
| O(2)-N(2)-C(12)  | 118.22(17) |
| N(1)-C(1)-C(2)   | 120.35(15) |
| N(1)-C(1)-C(6)   | 121.45(14) |
| C(2)-C(1)-C(6)   | 118.19(15) |
| C(3)-C(2)-C(1)   | 121.22(17) |
| C(3)-C(2)-H(2)   | 119.4      |
| C(1)-C(2)-H(2)   | 119.4      |
| C(2)-C(3)-C(4)   | 120.14(18) |
| C(2)-C(3)-H(3)   | 119.9      |
| C(4)-C(3)-H(3)   | 119.9      |
| C(5)-C(4)-C(3)   | 119.54(18) |
| C(5)-C(4)-H(4)   | 120.2      |
| C(3)-C(4)-H(4)   | 120.2      |
| C(4)-C(5)-C(6)   | 120.95(18) |
| C(4)-C(5)-H(5)   | 119.5      |
| C(6)-C(5)-H(5)   | 119.5      |
| C(5)-C(6)-C(1)   | 119.93(16) |
| C(5)-C(6)-S(1)   | 116.42(13) |
| C(1)-C(6)-S(1)   | 123.65(13) |
| C(8)-C(7)-C(15)  | 112.85(13) |
| C(8)-C(7)-S(1)   | 104.52(11) |
| C(15)-C(7)-S(1)  | 111.30(11) |
| C(8)-C(7)-H(7)   | 109.3      |
| C(15)-C(7)-H(7)  | 109.3      |
| S(1)-C(7)-H(7)   | 109.3      |
| O(3)-C(8)-C(9)   | 120.54(15) |
| O(3)-C(8)-C(7)   | 120.95(15) |

|                   |            |
|-------------------|------------|
| C(9)-C(8)-C(7)    | 118.51(14) |
| C(10)-C(9)-C(14)  | 119.55(15) |
| C(10)-C(9)-C(8)   | 122.24(14) |
| C(14)-C(9)-C(8)   | 118.22(14) |
| C(11)-C(10)-C(9)  | 120.66(16) |
| C(11)-C(10)-H(10) | 119.7      |
| C(9)-C(10)-H(10)  | 119.7      |
| C(12)-C(11)-C(10) | 117.98(16) |
| C(12)-C(11)-H(11) | 121.0      |
| C(10)-C(11)-H(11) | 121.0      |
| C(11)-C(12)-C(13) | 123.22(15) |
| C(11)-C(12)-N(2)  | 118.28(16) |
| C(13)-C(12)-N(2)  | 118.51(15) |
| C(12)-C(13)-C(14) | 118.18(15) |
| C(12)-C(13)-H(13) | 120.9      |
| C(14)-C(13)-H(13) | 120.9      |
| C(13)-C(14)-C(9)  | 120.39(16) |
| C(13)-C(14)-H(14) | 119.8      |
| C(9)-C(14)-H(14)  | 119.8      |
| N(1)-C(15)-C(16)  | 109.81(13) |
| N(1)-C(15)-C(7)   | 107.78(13) |
| C(16)-C(15)-C(7)  | 111.53(13) |
| N(1)-C(15)-H(15)  | 109.2      |
| C(16)-C(15)-H(15) | 109.2      |
| C(7)-C(15)-H(15)  | 109.2      |
| C(21)-C(16)-C(17) | 117.56(16) |
| C(21)-C(16)-C(15) | 121.07(14) |
| C(17)-C(16)-C(15) | 121.36(15) |
| C(18)-C(17)-C(16) | 121.17(16) |
| C(18)-C(17)-H(17) | 119.4      |
| C(16)-C(17)-H(17) | 119.4      |
| C(19)-C(18)-C(17) | 120.26(16) |
| C(19)-C(18)-H(18) | 119.9      |
| C(17)-C(18)-H(18) | 119.9      |
| O(4)-C(19)-C(18)  | 116.06(16) |
| O(4)-C(19)-C(20)  | 124.42(17) |
| C(18)-C(19)-C(20) | 119.53(16) |
| C(21)-C(20)-C(19) | 119.58(16) |
| C(21)-C(20)-H(20) | 120.2      |
| C(19)-C(20)-H(20) | 120.2      |
| C(20)-C(21)-C(16) | 121.89(16) |
| C(20)-C(21)-H(21) | 119.1      |
| C(16)-C(21)-H(21) | 119.1      |
| O(4)-C(22)-H(22A) | 109.5      |

|                     |       |
|---------------------|-------|
| O(4)-C(22)-H(22B)   | 109.5 |
| H(22A)-C(22)-H(22B) | 109.5 |
| O(4)-C(22)-H(22C)   | 109.5 |
| H(22A)-C(22)-H(22C) | 109.5 |
| H(22B)-C(22)-H(22C) | 109.5 |

---
